# Supplementary material for: Phyllosphere Fungal Communities of Plum and Antifungal Activity of Indigenous Phenazine-Producing Pseudomonas synxantha Against Monilinia laxa
Source: Front Microbiol. 2019 Oct 1;10:2287. doi: 10.3389/fmicb.2019.02287 (PMC6779809; doi:10.3389/fmicb.2019.02287)
Supplement: Supplementary file 2 [file Table_2.XLSX]

## Sheet: Phylum
	Lepotica		Rodna		Ranka		Požegača
Phylum	May	July	May	July	May	July	May	July
Ascomycota	77	89	79	87	77	85	46	56
Basidiomycota	23	10	20	11	21	14	53	44
Glomeromycota	0	0	0	2	0	0	0	0

## Sheet: Family
	Lepotica		Rodna		Ranka		Požegača
Family	May	July	May	July	May	July	May	July
Dothioraceae	18.6108	2.43859	30.3188	11.5471	23.7344	5.01783	33.4397	28.983
Incertae sedis	17.7444	5.77036	13.3578	8.78896	14.4591	9.03338	49.1326	40.6906
Cordycipitaceae	16.1355	3.54331	2.39674	0.957567	0.70414	0.761348	0.644768	0.474093
Mycosphaerellaceae	14.4802	31.7722	15.7546	20.7078	12.9295	12.1462	4.20885	14.4166
Sclerotiniaceae	8.49319	11.2998	5.24886	0.561397	14.0585	7.8255	4.7171	0.198938
Taphrinaceae	3.35705	0.511223	6.33538	2.27938	7.05354	2.49606	1.31264	1.52175
Dothideaceae	2.58354	1.08121	3.73492	0.668419	0.691999	0.375855	0.819087	1.55792
Cystofilobasidiaceae	2.3979	0.0705136	1.46201	0.125798	1.65109	0.179897	1.9301	0.754415
Metschnikowiaceae	1.57797	0.0411329	0.0239674	0.0187758	0.0849824	37.4763	0.0126013	0
Botryosphaeriaceae	1.17574	0.170408	0.263641	0.0544499	0.303509	0.0770985	0.0546058	0.00258
Pleosporaceae	0.835396	1.78634	1.62179	2.49531	2.78014	0.941245	0.384341	1.31118
Pseudeurotiaceae	0.634282	0.229169	3.80283	0.521968	0.36421	0.510778	0.0819087	0.232525
Teratosphaeriaceae	0.587871	1.41027	0.291603	0.475028	0.388491	1.32352	0.0084	0.124013
Saccharomycetaceae	0.479579	0.423081	1.45802	2.79572	0.837684	0.401555	0.056706	0.0284197
Elsinoaceae	0.464109	0.33494	1.70967	3.70447	1.09263	1.8857	0.233125	0.988232
Collemataceae	0.402228	0.0646374	0.0798913	0.0356741	0.206386	0.0610363	0.100811	0.0193771
Phaeosphaeriaceae	0.309406	0.188036	0.475353	0.779196	0.801263	0.729224	0.172218	0.326827
Leptosphaeriaceae	0.247525	0.0117523	0.143804	0.172737	0.145684	0.189534	0.0525056	0.0697575
Nectriaceae	0.232054	0.123399	0	21.5415	0.0242807	0.0835234	0.0042	0.0568395
Diversisporaceae	0.154703	0.458338	0.818886	2.06909	0.789122	0.424042	0.037804	0.0374624
Glomeraceae	0.154703	0.593489	0.263641	0.215922	0.570596	0.337306	0.0336036	0.0413378
Trichocomaceae	0.139233	0.0940181	0.0319565	5.81112	0.0728421	0.379068	0.0168018	0.0180853
Marasmiaceae	0.123762	0.329063	0.319565	0.148329	0.570596	0.353368	0.0525056	0.151141
Herpotrichiellaceae	0.108292	0.36432	0.275625	1.02891	0.594877	0.359793	0.0441047	0.29324
Diaporthaceae	0.0928218	0	0.0639131	0.0206534	0	0.00964	0.0042	0.00775
Mycocaliciaceae	0.0773515	0.0822658	0.0199728	0.0544499	0.036421	0.0353368	0	0
Tricholomataceae	0.0773515	0.0352568	0.0199728	0.0469395	0.133544	0.170259	0.037804	0.0555477
Chaetothyriaceae	0.0618812	0	0	0	0	0	0	0
Kondoaceae	0.0618812	0.0352568	0.0319565	0.0844912	0.0121403	0.13171	0.0042	0.0258361
Agaricostilbaceae	0.0464109	0.217417	0.107853	0.373639	0.291368	0.642488	0.0462049	0.313909
Teloschistaceae	0.0464109	0	0	0	0	0	0	0
Amphisphaeriaceae	0.0309406	0.0293807	0.0119837	0.0187758	0	0.00642	0	0.00258
Davidiellaceae	0.0309406	0.0705136	0.0399457	0.176493	0	0.109223	0.0294031	0.0671739
Myxotrichaceae	0.0309406	0	0	0.00376	0	0	0	0.00129
Parmeliaceae	0.0154703	0.135151	0.027962	0.00188	0.133544	0.0192746	0.0042	0
Agaricaceae	0	0.0117523	0	0	0	0	0	0
Apiosporaceae	0	0	0	0.00376	0.0242807	0	0	0
Archaeosporaceae	0	0	0	0	0.036421	0	0	0
Bolbitiaceae	0	0.0117523	0	0	0	0	0	0
Caliciaceae	0	0	0	0	0	0	0	0.00258
Calosphaeriaceae	0	0	0.00399	0	0	0	0	0
Ceratobasidiaceae	0	0	0	0	0	0.0128498	0	0
Chionosphaeraceae	0	0	0	0.00563	0	0.00964	0	0
Clavicipitaceae	0	0	0	0.0187758	0	0.0546115	0	0
Corticiaceae	0	0	0	0	0	0.00964	0.0021	0
Cucurbitariaceae	0	0	0.0399457	0.0244086	0	0.00642	0	0.00258
Cystobasidiaceae	0	0.0646374	0.0119837	0.00188	0.036421	0.0963732	0.0336036	0.0348788
Dermateaceae	0	0.129275	0.0159783	0.0112655	0	0.234508	0.0021	0
Erysiphaceae	0	0	0.0239674	0	0	0	0.0021	0
Exobasidiaceae	0	0.10577	0.00799	0.0732257	0.0728421	0.051399	0	0.00388
Gloeophyllaceae	0	0	0	0.00376	0.0728421	0	0	0.00258
Glomerellaceae	0	0.0117523	0	0	0	0	0	0
Gloniaceae	0	0	0	0.00376	0	0	0	0
Gnomoniaceae	0	0.00588	0.00399	0.00188	0	0	0	0
Helotiaceae	0	0	0.0119837	0	0.036421	0.00964	0.0042	0.00775
Hyaloscyphaceae	0	0	0	0.0131431	0	0.00964	0	0.00129
Hymenochaetaceae	0	0.047009	0.0359511	0.022531	0.0849824	0.0192746	0.0063	0.00646
Hypocreaceae	0	6.07004	0	0.00188	0	0	0	0
Inocybaceae	0	0	0.00399	0.0112655	0	0.00964	0	0.00517
Leucosporidiaceae	0	0	0.00399	0	0	0	0	0.0142099
Lobariaceae	0	0	0	0	0.0607017	0	0	0
Lophiostomataceae	0	0.0176284	0.0479348	0.00751	0.036421	0.00642	0	0.00129
Magnaporthaceae	0	0	0	0.00751	0	0	0	0
Malasseziaceae	0	0.0293807	0.00399	0.045062	0	0.0417617	0.0084	0.00388
Massariaceae	0	0	0	0.00188	0	0	0	0
Microstromataceae	0	0.0117523	0.027962	0.00751	0	0	0	0
Montagnulaceae	0	0	0.0239674	0.0168982	0.0485614	0.00642	0.0063	0.0116263
Mycenaceae	0	0	0	0	0	0	0.0105011	0.00129
Onygenaceae	0	0	0	0	0.0728421	0	0	0
Ophiostomataceae	0	0	0.0119837	0	0	0	0	0
Physalacriaceae	0	0	0	0.00188	0	0.00964	0	0
Physciaceae	0	0	0.00399	0.00939	0	0	0	0
Pichiaceae	0	0.229169	0	0	0	0	0	0
Protomycetaceae	0	0	0.00799	0.00939	0	0	0	0
Psathyrellaceae	0	0.0352568	0.0119837	0.022531	0	0.0128498	0.0063	0.0116263
Pyronemataceae	0	0	0.00799	0	0.036421	0	0	0
Ramalinaceae	0	0.00588	0.00399	0	0	0	0	0
Rhizopodaceae	0	0	0.0439402	0.00188	0	0.00321	0	0
Rhytismataceae	0	0	0	0	0	0.00642	0	0
Russulaceae	0	0.0176284	0	0	0.036421	0	0	0
Rutstroemiaceae	0	0	0	0	0	0	0	0.00517
Saccharomycodaceae	0	18.8036	0	0	0	0.00642	0	0
Saccharomycopsidaceae	0	0.00588	0	0	0	0	0	0
Sarcosomataceae	0	0	0	0	0	0.0128498	0	0
Schizoporaceae	0	0	0	0	0	0.00642	0	0
Septobasidiaceae	0	0.0293807	0	0	0	0.00642	0	0
Sordariaceae	0	0	0	0.0168982	0	0	0	0
Spizellomycetaceae	0	0	0	0	0	0	0.0042	0
Sporormiaceae	0	0.0293807	0	0	0	0	0	0
Strophariaceae	0	0	0	0.00376	0	0	0	0
Trichosporonaceae	0	0.0117523	0	0	0	0	0.0021	0
Uropyxidaceae	0	0.0117523	0	0.00376	0	0	0	0
Ustilaginaceae	0	0	0	0	0.0242807	0	0.0063	0
Venturiaceae	0	0	0	0	0.0607017	0.636063	0	0

## Sheet: Genus
	Lepotica		Rodna		Ranka		Požegača
Genus	May	July	May	July	May	July	May	July
Aureobasidium	19.2667	2.15605	28.2916	11.654	24.3678	5.0212	33.689	29.5105
Beauveria	17.3833	3.72521	2.58331	0.997067	0.763962	0.79124	0.651293	0.483455
Cryptococcus	17.2667	4.89282	12.1631	5.68133	12.2761	6.78396	48.8045	39.0979
Mycosphaerella	15.4167	14.9503	16.77	19.0264	13.725	9.88549	4.18779	13.7264
Didymella	5.88333	3.65726	5.85551	8.9697	10.7877	9.32795	0.893141	4.47228
Endoconidioma	2.78333	1.13671	4.01705	0.684262	0.75079	0.377258	0.812525	1.5215
Taphrina	2.63333	0.389201	4.9944	1.82991	5.55848	1.59249	0.967393	0.97613
Udeniomyces	2.56667	0.0741336	1.53707	0.129032	1.60695	0.18696	1.70779	0.769312
Botrytis	2.15	5.30055	2.44123	0.185728	6.09852	3.70914	2.25089	0.104068
Metschnikowia	1.7	0.0432446	0.0258331	0.0195503	0.0922023	38.9477	0.0127289	0
Lasiodiplodia	1.25	0.179156	0.284164	0.0488759	0.316122	0.0801255	0.0509154	0.00263
Rhodotorula	1.15	1.72978	0.792216	0.922776	1.34352	1.86626	0.0763731	0.951101
Lalaria	0.983333	0.148267	1.83415	0.5435	2.09431	1.00157	0.358529	0.575667
Alternaria	0.85	1.79774	1.62749	2.51417	2.77924	0.944813	0.358529	1.29887
Dumontinia	0.816667	3.3669	1.4036	0.179863	2.9373	2.57737	1.43412	0.0382021
Sclerotinia	0.75	1.52592	0.82666	0.103617	2.01528	1.33876	0.840104	0.021077
Sydowia	0.716667	0.395379	4.21941	0.353861	1.2118	0.173605	0.0784946	0.0368848
Dioszegia	0.583333	0.265645	0.779299	1.1085	1.304	1.20522	0.165475	1.25013
Zygosaccharomyces	0.466667	0.413912	1.51124	2.90909	0.763962	0.393951	0.0572798	0.0289809
Leptogium	0.433333	0.0679558	0.0861104	0.0371457	0.22392	0.0634327	0.101831	0.0197597
Devriesia	0.333333	0.790758	0.167915	0.349951	0.184405	1.07168	0.00424	0.10802
Elsinoe	0.333333	0.290356	1.68776	3.44673	0.842993	1.78613	0.207905	0.993255
Erythrobasidium	0.333333	0.710447	0.779299	0.985337	0.737619	1.73271	0.17184	0.540099
Gibberella	0.25	0.0741336	0	0.0918866	0	0.0166928	0.00424	0.00527
Tumularia	0.25	3.28041	0.0258331	0.0645161	0.0131718	0.0801255	0.0360651	0.0171251
Sporobolomyces	0.216667	0.333601	0.49944	0.340176	0.500527	1.04831	0.103952	0.453156
Naevala	0.2	0.191512	0.520968	0.318671	0.355637	0.190298	0.0594013	0.14227
Phaeosphaeria	0.183333	0.117378	0.232498	0.443793	0.487355	0.397289	0.101831	0.200232
Diversispora	0.166667	0.481868	0.882631	2.15445	0.856164	0.44069	0.0381866	0.0382021
Hannaella	0.166667	0.210045	0.099027	0.058651	0.052687	0.0901412	0.0275792	0.0118558
Ramularia	0.166667	0.642491	0.0387497	0.516129	0.0790306	0.901412	0.0487939	0.405733
Bullera	0.15	0.172978	0.189443	0.146628	0.289779	0.237038	0.180325	0.204184
Coniothyrium	0.15	0.00618	0.0904159	0.105572	0.0658588	0.0901412	0.00424	0.0144905
Marasmiellus	0.133333	0.345957	0.344442	0.154448	0.619073	0.353888	0.0530369	0.154126
Sphaceloma	0.116667	0.061778	0.142082	0.377322	0.316122	0.173605	0.0275792	0.0144905
Aspergillus	0.1	0.030889	0.0258331	5.96676	0.0131718	0.227022	0.0148503	0.0105385
Chalara	0.1	0	0.0387497	0	0	0.00668	0	0
Diaporthe	0.1	0	0.0387497	0.0136852	0	0	0	0.00263
Leptosphaeria	0.1	0.00618	0.0301386	0.0332356	0.0658588	0.0133543	0.0360651	0.025029
Torula	0.1	0	0	0.00196	0	0	0	0
Chaenothecopsis	0.0833333	0.0864892	0.0215276	0.056696	0.0395153	0.0367242	0	0
Exophiala	0.0833333	0.296534	0.266942	1.02053	0.22392	0.337195	0.0360651	0.297713
Leucopaxillus	0.0833333	0.0370668	0.0215276	0.0410557	0.144889	0.176944	0.0381866	0.0566445
Cyphellophora	0.0666667	0	0	0	0	0	0	0
Kondoa	0.0666667	0.0370668	0.0344442	0.0879765	0.0131718	0.136881	0.00424	0.0263463
Pringsheimia	0.0666667	0.0123556	0.167915	0.0136852	0.171233	0.0200314	0.0106074	0.0079
Rachicladosporium	0.0666667	0.172978	0.133471	0.441838	0.118546	0.210329	0.00212	0.0869428
Teratosphaeria	0.0666667	0.030889	0.00431	0.058651	0	0.0567556	0	0.0079
Austroplaca	0.05	0	0	0	0	0	0	0
Bensingtonia	0.05	0.228578	0.116249	0.389052	0.316122	0.667713	0.0466725	0.320107
Fibulobasidium	0.05	0.0247112	0	0	0	0	0	0
Penicillium	0.05	0.0185334	0.00861	0.0840665	0.0658588	0.166928	0.00212	0.0079
Saccharomyces	0.05	0	0	0	0	0	0	0
Stemphylium	0.05	0.0432446	0.0215276	0.00782	0.052687	0.0100157	0.0127289	0.0197597
Cladosporium	0.0333333	0.0741336	0.0430552	0.183773	0	0.113511	0.0297007	0.0685004
Leptospora	0.0333333	0.00618	0.0258331	0.0684262	0	0.0734484	0.0106074	0.0329329
Monilinia	0.0333333	0.0494224	0	0	0.0658588	0.0166928	0	0.0079
Peltaster	0.0333333	0.234756	0.0172221	0.0293255	0.0131718	0.0567556	0	0.00263
Phaeococcomyces	0.0333333	0.0864892	0.0258331	0.00782	0.0131718	0	0.00849	0.00132
Pseudogymnoascus	0.0333333	0	0	0.00391	0	0	0	0.00132
Seiridium	0.0333333	0.00618	0.00861	0.00196	0	0	0	0.00263
Strelitziana	0.0333333	0.0185334	0	0.0527859	0	0.0367242	0	0.0184424
Derxomyces	0.0166667	0.0247112	0.0301386	0.0351906	0.131718	0.00668	0	0.0105385
Dothiorella	0.0166667	0	0	0	0.0131718	0	0	0
Itersonilia	0.0166667	0	0.0387497	0.00196	0.158061	0	0.0190933	0
Knufia	0.0166667	0.0247112	0	0.0312805	0	0	0	0
Mrakiella	0.0166667	0	0.00431	0	0	0	0.678872	0.00263
Peyronellaea	0.0166667	0	0.0559718	0.0840665	0.105374	0	0.00212	0.021077
Sclerostagonospora	0.0166667	0.00618	0.0904159	0	0	0.0367242	0	0
Subplenodomus	0.0166667	0	0.00861	0.00391	0	0.0233699	0.00424	0
Usnea	0.0166667	0.117378	0.0301386	0	0.0790306	0.0200314	0	0
Abrothallus	0	0	0	0.00391	0	0	0	0
Acicuseptoria	0	0	0.00861	0.00587	0	0.00334	0	0
Agaricus	0	0.0123556	0	0	0	0	0	0
Amandinea	0	0	0	0	0	0	0	0.00263
Archaeospora	0	0	0	0	0.0395153	0	0	0
Arrhenia	0	0	0	0.00782	0	0	0	0
Arthrocatena	0	0	0.00861	0.0175953	0.0395153	0	0	0.00395
Articulospora	0	0	0	0	0	0	0	0.0079
Ascochyta	0	0	0	0.0254154	0	0.0100157	0	0.0118558
Biatora	0	0.00618	0.00431	0	0	0	0	0
Blumeria	0	0	0	0	0	0	0.00212	0
Botryozyma	0	0	0	0	0.0131718	0	0.00636	0
Bulleromyces	0	0.0370668	0.0387497	0.0449658	0.0395153	0.0934798	0.0487939	0.169934
Cadophora	0	0.0741336	0.0516662	0.0469208	0.0263435	0.00668	0.00636	0.0171251
Camarosporium	0	0	0	0.00391	0.0263435	0.00334	0.00424	0
Candida	0	0.00618	0	0	0	0	0	0.0632311
Catenulostroma	0	0.0185334	0	0.0117302	0	0.0267085	0	0
Cenococcum	0	0	0	0.00391	0	0	0	0
Chaetosphaeronema	0	0	0	0.00196	0.0922023	0.0233699	0.00424	0
Chionosphaera	0	0	0	0.00587	0	0	0	0
Ciboria	0	0.0123556	0	0	0.105374	0	0	0
Ciborinia	0	0	0.00861	0	0	0	0	0.00395
Cistella	0	0	0	0	0	0.0100157	0	0
Claviceps	0	0	0	0.0195503	0	0.0567556	0	0
Clitocybula	0	0	0	0	0	0.0133543	0	0
Colletotrichum	0	0.0123556	0	0	0	0	0	0
Collophora	0	0.0185334	0	0	0	0	0	0
Coniocessia	0	0.1112	0	0	0	0	0	0
Conocybe	0	0.0123556	0	0	0	0	0	0
Coprinellus	0	0	0	0.00978	0	0.0100157	0	0.00132
Coprinopsis	0	0	0.0129166	0.00978	0	0.00334	0.00424	0.0105385
Cryptotrichosporon	0	0.0123556	0	0	0	0	0.00212	0
Curreya	0	0	0	0.00782	0	0	0	0.00263
Curvibasidium	0	0	0	0	0	0.00334	0	0.00659
Cyathicula	0	0	0.0129166	0	0.0131718	0	0	0
Cylindrocladiella	0	0	0	0.00978	0	0	0	0
Cystobasidium	0	0.0679558	0.0129166	0.00196	0.0395153	0.0968183	0.0339436	0.0355675
Cystofilobasidium	0	0	0	0	0.0263435	0	0.21639	0
Dendryphion	0	0	0.0172221	0	0	0	0	0
Diplodia	0	0	0	0.00782	0	0	0.00424	0
Dissoconium	0	0.105022	0	0.332356	0	0.517477	0	0.137001
Dothidea	0	0	0.00861	0.0117302	0	0.0133543	0.0148503	0.0671831
Dothistroma	0	0	0	0	0	0.0100157	0	0
Elmerina	0	0	0	0.00196	0.0395153	0.0100157	0	0
Endosporium	0	0	0	0.00587	0	0	0.0127289	0
Epicoccum	0	0.0247112	0.00431	0.0391007	0.0790306	0.0166928	0	0.00132
Exidia	0	0.0247112	0.00861	0.0156403	0.0395153	0.0300471	0.00424	0.0079
Exobasidium	0	0.1112	0.00861	0.0762463	0.0790306	0.053417	0	0.00395
Fomitiporia	0	0.00618	0	0	0.0263435	0	0	0
Fulvoflamma	0	0	0.0258331	0	0	0	0	0
Funneliformis	0	0	0	0	0	0	0	0.00132
Fusarium	0	0	0	22.1212	0	0.00334	0	0
Glarea	0	0	0	0	0.0131718	0	0	0
Gloeophyllum	0	0	0	0.00391	0.0790306	0	0	0.00263
Gnomoniopsis	0	0.00618	0	0.00196	0	0	0	0
Hanseniaspora	0	19.769	0	0	0	0.00668	0	0
Hyphodiscus	0	0.00618	0.00861	0	0	0	0	0
Inocybe	0	0	0.00431	0.0117302	0	0.0100157	0	0.00527
Inonotus	0	0.0432446	0.0387497	0.0234604	0.0658588	0.0200314	0.00636	0.00659
Kazachstania	0	0	0	0.00196	0.105374	0	0	0
Kockovaella	0	0	0	0	0	0.00334	0	0
Kurtzmanomyces	0	0	0	0	0	0.0100157	0	0
Lachnum	0	0	0	0.0136852	0	0	0	0.00132
Lambertella	0	0	0	0	0	0	0	0.00527
Letendraea	0	0.0494224	0	0	0	0	0	0
Leucosporidium	0	0	0.00431	0	0	0	0	0.0144905
Lophiostoma	0	0.0123556	0.0387497	0.00391	0.0131718	0	0	0.00132
Lophodermium	0	0	0	0	0	0.00668	0	0
Malassezia	0	0.030889	0.00431	0.0469208	0	0.0434013	0.00849	0.00395
Massaria	0	0	0	0.00196	0	0	0	0
Melanelia	0	0	0	0	0	0	0.00424	0
Melanohalea	0	0.0123556	0	0	0.0658588	0	0	0
Microstroma	0	0.0123556	0.0301386	0.00782	0	0	0	0
Mollisia	0	0	0.00861	0.0117302	0	0	0.00212	0
Monochaetia	0	0	0.00431	0.00196	0	0	0	0
Monographella	0	0	0.00431	0.00587	0	0	0	0
Mycena	0	0	0	0	0	0	0.0106074	0.00132
Nannizziopsis	0	0	0	0	0.0790306	0	0	0
Neoerysiphe	0	0	0.0258331	0	0	0	0	0
Neosetophoma	0	0	0	0.00587	0	0	0	0.00527
Occultifur	0	0	0	0	0	0.00334	0	0
Ochroconis	0	0	0	0.00978	0	0.0233699	0	0.00395
Papiliotrema	0	0	0	0	0	0	0	0.00395
Paraphaeosphaeria	0	0	0.0258331	0.0175953	0.052687	0	0.00636	0.00527
Paraphoma	0	0	0	0.00196	0.0131718	0	0	0
Periconia	0	0.0123556	0.0602773	0.0254154	0	0.0166928	0	0.00922
Pezicula	0	0.135911	0	0	0	0.243715	0	0
Phacidiella	0	0	0.0129166	0.0215054	0	0	0	0.0289809
Phaeomycocentrospora	0	0	0.00861	0	0.0131718	0.0166928	0.00212	0.00263
Phaeoramularia	0	0.0432446	0	0.00782	0	0.00334	0.00849	0.00132
Phoma	0	0	0.00431	0.0117302	0	0.0133543	0	0.00659
Physcia	0	0	0.00431	0	0	0	0	0
Pichia	0	0.240934	0	0	0	0	0	0
Plagiostoma	0	0	0.00431	0	0	0	0	0
Plectania	0	0	0	0	0	0.0133543	0	0
Plenodomus	0	0	0.0172221	0.00587	0.0263435	0.00334	0	0.00395
Powellomyces	0	0	0	0	0	0	0.00424	0
Protomyces	0	0	0.00861	0.00978	0	0	0	0
Psathyrella	0	0.0370668	0	0.00391	0	0	0.00212	0
Pseudocercosporella	0	0.0556002	0.00431	0.0742913	0	0.130204	0	0.0184424
Pseudocyphellaria	0	0	0	0	0.0658588	0	0	0
Psilocybe	0	0	0	0.00391	0	0	0	0
Pyrenochaeta	0	0	0.0172221	0.0332356	0	0.00334	0	0
Pyrenochaetopsis	0	0	0.0430552	0.0175953	0	0.00668	0	0
Pyrenophora	0	0	0.0774994	0.0254154	0	0	0.00849	0.00659
Pyricularia	0	0	0	0.00782	0	0	0	0
Raffaelea	0	0	0.0129166	0	0	0	0	0
Ramichloridium	0	16.4453	0	0	0	0	0	0
Rhizophagus	0	0	0	0.00978	0	0	0	0
Rhizopus	0	0	0.0473607	0.00196	0	0.00334	0	0
Rhodosporidium	0	0	0	0	0	0.0166928	0.00212	0.00527
Rhynchosporium	0	0	0.00431	0	0	0.00668	0	0
Rinodina	0	0	0	0.00978	0	0	0	0
Russula	0	0.0185334	0	0	0.0395153	0	0	0
Saccharomycopsis	0	0.00618	0	0	0	0	0	0
Sarcinomyces	0	0.061778	0.00431	0.0391007	0.0263435	0.0166928	0	0.00395
Sarocladium	0	0.00618	0	0.0117302	0	0.00334	0	0
Schizopora	0	0	0	0	0	0.00668	0	0
Septobasidium	0	0.030889	0	0	0	0.00668	0	0
Septoria	0	0.0370668	0.0387497	0.103617	0.0790306	0.113511	0.00424	0.0329329
Setomelanomma	0	0	0	0	0	0	0	0.00395
Setophaeosphaeria	0	0	0	0.0156403	0	0.0100157	0.0127289	0.00263
Sigarispora	0	0.00618	0.0129166	0.00391	0.0263435	0.00668	0	0
Sordaria	0	0	0	0.0175953	0	0	0	0
Sphaerographium	0	0	0.00861	0	0	0	0	0
Sphaerulina	0	0.0803114	0.0172221	0.228739	0.0263435	0.0701098	0	0.00132
Spirosphaera	0	0	0	0.00587	0	0	0	0.00263
Stachybotrys	0	0	0	0	0	0	0.00636	0
Stagonospora	0	0.030889	0.0344442	0.0410557	0.052687	0.0133543	0.00424	0.00395
Stenella	0	0	0	0.00391	0	0.0166928	0	0.00395
Strobilurus	0	0	0	0.00196	0	0.0100157	0	0
Talaromyces	0	0.0494224	0	0	0	0	0	0
Tetracladium	0	0	0	0.00391	0	0	0	0
Tetrapisispora	0	0.030889	0.0602773	0	0.0395153	0.0233699	0	0
Tilletiopsis	0	0	0	0.0136852	0	0	0	0.00263
Togniniella	0	0	0.00431	0	0	0	0	0
Toxicocladosporium	0	0	0	0.00587	0	0	0	0.00263
Tranzschelia	0	0.0123556	0	0.00391	0	0	0	0
Tremella	0	0.030889	0.00861	0.00978	0	0.0166928	0	0
Trichoderma	0	6.38166	0	0	0	0	0	0
Trimmatostroma	0	0	0	0.00196	0	0.00668	0.00424	0
Truncatella	0	0	0	0.00587	0	0	0	0
Ulocladium	0	0.0123556	0	0.00782	0.105374	0	0	0.00659
Venturia	0	0	0	0	0.0658588	0.661036	0	0
Xanthophyllomyces	0	0	0	0	0	0	0.00636	0
Zymoseptoria	0	0.0185334	0	0.00782	0	0.0701098	0.00636	0.00659

## Sheet: Species
Lepotica		Rodna		Ranka		Požegača
May	July	May	July	May	July	May	July	Species
16.9112	3.22277	2.33643	0.738193	0.852562	0.546689	0.634546	0.385876	k__Fungi; p__Ascomycota; c__Sordariomycetes; o__Hypocreales; f__Cordycipitaceae; g__Beauveria; s__Beauveria felina
15.7537	1.86165	20.9578	7.86863	19.508	3.2212	29.2714	21.655	k__Fungi; p__Ascomycota; c__Dothideomycetes; o__Dothideales; f__Dothioraceae; g__Aureobasidium; s__Aureobasidium pullulans
14.2479	11.7853	13.0282	13.0923	10.8688	6.49215	3.65039	10.3658	k__Fungi; p__Ascomycota; c__Dothideomycetes; o__Capnodiales; f__Mycosphaerellaceae; g__Mycosphaerella; s__Mycosphaerella tumulosa
5.5206	0.582849	2.45832	1.02632	5.0264	0.970638	8.93708	24.8656	k__Fungi; p__Basidiomycota; c__Tremellomycetes; o__Tremellales; f__Incertae sedis; g__Cryptococcus; s__Cryptococcus wieringae
5.36868	1.28334	0.980663	0.0781666	3.68774	0.363403	0.227006	0.0210153	k__Fungi; p__Ascomycota; c__Leotiomycetes; o__Helotiales; f__Sclerotiniaceae; g__unidentified; s__Sclerotiniaceae sp
5.31735	3.30268	4.68909	6.91316	9.20868	7.04784	0.867975	3.66847	k__Fungi; p__Ascomycota; c__Dothideomycetes; o__Pleosporales; f__Incertae sedis; g__Didymella; s__Didymella phacae
4.19782	2.19499	2.26611	1.88799	2.31982	2.36946	3.65856	2.09532	k__Fungi; p__Basidiomycota; c__Tremellomycetes; o__Tremellales; f__Incertae sedis; g__Cryptococcus; s__Cryptococcus sp
2.44684	0.903767	2.84818	0.494619	0.491471	0.209266	0.694996	1.13507	k__Fungi; p__Ascomycota; c__Dothideomycetes; o__Dothideales; f__Dothideaceae; g__Endoconidioma; s__Endoconidioma populi
2.28774	0.00858871	0.0248413	0	0.175459	32.6201	0.0104552	0.00124934	k__Fungi; p__Ascomycota; c__Saccharomycetes; o__Saccharomycetales; f__Metschnikowiaceae; g__Metschnikowia; s__Metschnikowia sp
2.17066	4.55008	1.95753	0.188715	5.44637	2.84013	2.18789	0.070191	k__Fungi; p__Ascomycota; c__Leotiomycetes; o__Helotiales; f__Sclerotiniaceae; g__Botrytis; s__Botrytis caroliniana
1.99526	0.285642	2.48237	0.615971	3.30041	0.836943	0.702362	0.559401	k__Fungi; p__Ascomycota; c__Taphrinomycetes; o__Taphrinales; f__Taphrinaceae; g__Taphrina; s__Taphrina pruni
1.91447	0.355539	2.80602	0.197839	0.668394	0.683082	21.9036	3.35641	k__Fungi; p__Basidiomycota; c__Tremellomycetes; o__Tremellales; f__Incertae sedis; g__Cryptococcus; s__Cryptococcus victoriae
1.88889	0.0436099	1.28429	0.113331	1.48272	0.155543	1.61118	0.487914	k__Fungi; p__Basidiomycota; c__Tremellomycetes; o__Cystofilobasidiales; f__Cystofilobasidiaceae; g__Udeniomyces; s__Udeniomyces pannonicus
1.56673	7.86767	1.08575	4.57446	3.32199	12.5459	0.222526	1.40023	k__Fungi; p__Ascomycota; c__unidentified; o__unidentified; f__unidentified; g__unidentified; s__Ascomycota sp
1.51431	0.252656	0.167258	0.0278748	0.217033	0.0731682	0.0401631	0.00884364	k__Fungi; p__Ascomycota; c__Dothideomycetes; o__Botryosphaeriales; f__Botryosphaeriaceae; g__Lasiodiplodia; s__Lasiodiplodia macrospora
1.31623	0.570341	2.67564	0.958956	3.1821	1.16382	2.98838	1.62552	k__Fungi; p__Basidiomycota; c__Microbotryomycetes; o__Sporidiobolales; f__unidentified; g__unidentified; s__Sporidiobolales sp
1.14111	0.284982	0.737654	0.377769	1.34418	0.32704	10.2455	1.60585	k__Fungi; p__Basidiomycota; c__Tremellomycetes; o__Tremellales; f__Incertae sedis; g__Cryptococcus; s__Cryptococcus carnescens
1.05385	0.430718	0.168034	0.0775174	0.180661	0.121044	0.0690888	0.0387309	k__Fungi; p__Basidiomycota; c__Tremellomycetes; o__Tremellales; f__Incertae sedis; g__Cryptococcus; s__Cryptococcus neoformans
1.0106	0.492587	0.844015	0.39748	1.48411	0.43553	0.472532	0.669553	k__Fungi; p__Basidiomycota; c__Tremellomycetes; o__Tremellales; f__Incertae sedis; g__unidentified; s__Incertae sedis sp
0.979528	2.82342	1.14062	0.13264	2.64665	1.97004	1.47115	0.0364014	k__Fungi; p__Ascomycota; c__Leotiomycetes; o__Helotiales; f__Sclerotiniaceae; g__Dumontinia; s__Dumontinia tuberosa
0.912751	1.13951	0.576233	0.561646	1.20732	0.905432	0.060079	0.525064	k__Fungi; p__Basidiomycota; c__Microbotryomycetes; o__Sporidiobolales; f__Incertae sedis; g__Rhodotorula; s__Rhodotorula aurantiaca
0.851055	0.384525	3.64856	0.269906	1.13769	0.142622	0.0513159	0.0296683	k__Fungi; p__Ascomycota; c__Dothideomycetes; o__Dothideales; f__Dothioraceae; g__Sydowia; s__Sydowia polyspora
0.729466	0.104078	1.25874	0.327054	1.5883	0.608978	0.32018	0.366703	k__Fungi; p__Ascomycota; c__Taphrinomycetes; o__Taphrinales; f__Taphrinaceae; g__Lalaria; s__Lalaria sp
0.683398	0.0447796	0.493466	0.0969755	0.317184	0.176156	0.459465	0.800514	k__Fungi; p__Basidiomycota; c__Tremellomycetes; o__Tremellales; f__Incertae sedis; g__Cryptococcus; s__Cryptococcus magnus
0.655011	0.254882	3.53456	0.445744	0.427758	0.478093	0.0602256	0.223783	k__Fungi; p__Ascomycota; c__Incertae sedis; o__Incertae sedis; f__Pseudeurotiaceae; g__unidentified; s__Pseudeurotiaceae sp
0.604387	1.4733	0.701505	0.100709	1.78108	1.00919	0.732854	0.0166601	k__Fungi; p__Ascomycota; c__Leotiomycetes; o__Helotiales; f__Sclerotiniaceae; g__Sclerotinia; s__Sclerotinia sclerotiorum
0.453903	0.133076	0.369353	0.364493	0.633932	0.494429	0.124856	0.740407	k__Fungi; p__Basidiomycota; c__Tremellomycetes; o__Tremellales; f__Incertae sedis; g__Dioszegia; s__Dioszegia hungarica
0.409348	0.0734626	0.0722033	0.0409557	0.114145	0.0536125	0.066444	0.020826	k__Fungi; p__Ascomycota; c__Lecanoromycetes; o__Peltigerales; f__Collemataceae; g__Leptogium; s__Leptogium sp
0.381218	0.312955	0.103129	0.209356	0.147643	0.0708086	0.00418208	0.0581301	k__Fungi; p__Basidiomycota; c__Tremellomycetes; o__Tremellales; f__unidentified; g__unidentified; s__Tremellales sp
0.335193	0.45027	0.667708	0.639796	0.878112	1.11064	0.125063	0.471363	k__Fungi; p__Basidiomycota; c__Cystobasidiomycetes; o__Erythrobasidiales; f__Incertae sedis; g__Erythrobasidium; s__Erythrobasidium hasegawianum
0.325428	0.0111949	0.14381	0.0269376	0.348903	0.0763345	0.0240978	0.031675	k__Fungi; p__Ascomycota; c__Taphrinomycetes; o__Taphrinales; f__Taphrinaceae; g__Taphrina; s__Taphrina populina
0.323669	0.0298947	0	0.0799952	0.0172662	0.00676746	0.00183858	0.00551574	k__Fungi; p__Ascomycota; c__Sordariomycetes; o__Hypocreales; f__Nectriaceae; g__Gibberella; s__Gibberella tricincta
0.291121	0.399574	0.51524	0.688843	0.80836	0.286315	0.151732	0.316476	k__Fungi; p__Ascomycota; c__Dothideomycetes; o__Pleosporales; f__Pleosporaceae; g__Alternaria; s__Alternaria infectoria
0.281345	0.268639	0.715085	1.68677	0.196588	0.302219	0.0730186	0.524661	k__Fungi; p__Ascomycota; c__Dothideomycetes; o__Capnodiales; f__unidentified; g__unidentified; s__Capnodiales sp
0.280135	0.00385473	0.0320411	0.0139131	0.0491471	0	0.0348498	0.0109066	k__Fungi; p__Basidiomycota; c__Tremellomycetes; o__Cystofilobasidiales; f__Cystofilobasidiaceae; g__Udeniomyces; s__Udeniomyces pyricola
0.27941	0.479547	1.41229	2.55236	1.00082	0.393241	0.0889678	0.0222512	k__Fungi; p__Ascomycota; c__Saccharomycetes; o__Saccharomycetales; f__Saccharomycetaceae; g__Zygosaccharomyces; s__Zygosaccharomyces microellipsoides
0.237498	0.229843	1.28556	2.97993	0.797898	1.53971	0.248282	0.900799	k__Fungi; p__Ascomycota; c__Dothideomycetes; o__Myriangiales; f__Elsinoaceae; g__Elsinoe; s__Elsinoe sp
0.237498	0.0768948	0.243317	0.568616	0.41871	0.191579	0.648747	2.07901	k__Fungi; p__Basidiomycota; c__Tremellomycetes; o__Tremellales; f__Incertae sedis; g__Cryptococcus; s__Cryptococcus chernovii
0.231595	0.77451	0.144516	0.324603	0.206649	0.849636	0.00497854	0.0920213	k__Fungi; p__Ascomycota; c__Dothideomycetes; o__Capnodiales; f__Teratosphaeriaceae; g__Devriesia; s__Devriesia pseudoamericana
0.226438	0.070303	0.0741072	0.038424	0.118507	0.109144	0.369481	0.213657	k__Fungi; p__Basidiomycota; c__Tremellomycetes; o__Tremellales; f__Incertae sedis; g__Cryptococcus; s__Cryptococcus dimennae
0.221581	0.558102	0.271996	0.183598	0.696775	0.227823	0.0352161	0.0318196	k__Fungi; p__Glomeromycota; c__Glomeromycetes; o__Glomerales; f__Glomeraceae; g__unidentified; s__Glomeraceae sp
0.221422	0.372444	0.366461	0.455236	0.410629	0.169179	0.0482304	0.131522	k__Fungi; p__Ascomycota; c__Dothideomycetes; o__unidentified; f__unidentified; g__unidentified; s__Dothideomycetes sp
0.215511	0.430202	0.165144	0.105234	0.231653	0.545555	0.0398091	0.230503	k__Fungi; p__Basidiomycota; c__Microbotryomycetes; o__Sporidiobolales; f__Incertae sedis; g__Rhodotorula; s__Rhodotorula sp
0.211047	1.14562	0.772354	1.1573	1.37086	0.385987	0.19323	0.654398	k__Fungi; p__Ascomycota; c__Dothideomycetes; o__Pleosporales; f__Pleosporaceae; g__Alternaria; s__Alternaria alternata
0.184471	2.68612	0.00852508	0.0467619	0.0239734	0.0552144	0.0420937	0.00901456	k__Fungi; p__Ascomycota; c__Incertae sedis; o__Incertae sedis; f__Incertae sedis; g__Tumularia; s__Tumularia sp
0.183565	0.452847	0.816447	1.89432	0.790673	0.366279	0.0455789	0.020672	k__Fungi; p__Glomeromycota; c__Glomeromycetes; o__Diversisporales; f__Diversisporaceae; g__Diversispora; s__Diversispora celata
0.179013	0.0115642	0.0174058	0.0459133	0.0491471	0.0667214	0.00331903	0.0485356	k__Fungi; p__Basidiomycota; c__Tremellomycetes; o__Tremellales; f__Incertae sedis; g__Cryptococcus; s__Cryptococcus statzelliae
0.175474	0.721651	0.174952	0.0801292	0.175803	0.140361	0.00937451	0.0172728	k__Fungi; p__Ascomycota; c__Dothideomycetes; o__Capnodiales; f__Teratosphaeriaceae; g__unidentified; s__Teratosphaeriaceae sp
0.174908	0.0752119	0.584437	0.42193	0.471478	0.203494	0.00971393	0.0251498	k__Fungi; p__Ascomycota; c__Taphrinomycetes; o__Taphrinales; f__Taphrinaceae; g__Taphrina; s__Taphrina communis
0.152125	0.135176	0.102146	0.116283	0.203842	0.255532	0.0189662	0.233238	k__Fungi; p__Basidiomycota; c__Microbotryomycetes; o__Sporidiobolales; f__Incertae sedis; g__Sporobolomyces; s__Sporobolomyces coprosmae
0.147399	0.247069	0.271356	0.713413	0.163713	0.28106	0.0489968	0.267084	k__Fungi; p__Ascomycota; c__Eurotiomycetes; o__Chaetothyriales; f__Herpotrichiellaceae; g__Exophiala; s__Exophiala sp
0.139705	0	0.00726319	0.00346927	0	0	0	0.00247236	k__Fungi; p__Ascomycota; c__Sordariomycetes; o__Diaporthales; f__Diaporthaceae; g__Diaporthe; s__Diaporthe cotoneastri
0.126554	0.226384	0.332265	0.108423	0.638329	0.221499	0.0618506	0.101903	k__Fungi; p__Basidiomycota; c__Agaricomycetes; o__Agaricales; f__Marasmiaceae; g__Marasmiellus; s__Marasmiellus stenophyllus
0.122696	0.00480593	0.147316	0.0433658	0.0510622	0.13108	0.237037	0.144659	k__Fungi; p__Basidiomycota; c__Tremellomycetes; o__Tremellales; f__Incertae sedis; g__Cryptococcus; s__Cryptococcus laurentii
0.120363	0.0669879	0.0825944	0.0341211	0.0523831	0.0705927	0.211545	0.159404	k__Fungi; p__Basidiomycota; c__Tremellomycetes; o__unidentified; f__unidentified; g__unidentified; s__Tremellomycetes sp
0.112349	0.059806	0.0459437	0.0725998	0.00819118	0.0363742	0.0193928	0.0422315	k__Fungi; p__Ascomycota; c__Dothideomycetes; o__Capnodiales; f__Davidiellaceae; g__Cladosporium; s__Cladosporium exasperatum
0.112256	0.643253	0.0325443	0.394621	0.0834028	0.1616	0.0074321	0.0202592	k__Fungi; p__Ascomycota; c__Eurotiomycetes; o__Chaetothyriales; f__unidentified; g__unidentified; s__Chaetothyriales sp
0.111913	0.14428	0.0580399	0.0466062	0.100886	0.0570873	0.0122886	0.0123749	k__Fungi; p__Basidiomycota; c__Agaricomycetes; o__unidentified; f__unidentified; g__unidentified; s__Agaricomycetes sp
0.111731	0.115308	0.132756	0.425649	0.399302	0.248376	0.0147087	0.121278	k__Fungi; p__Basidiomycota; c__Tremellomycetes; o__Tremellales; f__Incertae sedis; g__Dioszegia; s__Dioszegia zsoltii var. yunnanensis
0.109591	0.133251	0.13934	0.0742729	0.220677	0.129013	0.118927	0.117687	k__Fungi; p__Basidiomycota; c__Tremellomycetes; o__Tremellales; f__Incertae sedis; g__Bullera; s__Bullera globospora
0.109318	0.1241	0.332478	0.216033	0.20777	0.145964	0.065018	0.111239	k__Fungi; p__Ascomycota; c__Leotiomycetes; o__Helotiales; f__Incertae sedis; g__Naevala; s__Naevala sp
0.109318	0.518962	0.0284169	0.394985	0.111876	0.534543	0.0339988	0.322111	k__Fungi; p__Ascomycota; c__Dothideomycetes; o__Capnodiales; f__Mycosphaerellaceae; g__Ramularia; s__Ramularia collo-cygni
0.101244	0.19591	0.0789541	0.3797	0.101763	0.142289	0.00562278	0.0909642	k__Fungi; p__Ascomycota; c__Dothideomycetes; o__Capnodiales; f__Incertae sedis; g__Rachicladosporium; s__Rachicladosporium sp
0.099432	0.544993	0.272065	0.716079	0.81368	0.386243	0.0678272	0.292037	k__Fungi; p__Ascomycota; c__Dothideomycetes; o__Pleosporales; f__unidentified; g__unidentified; s__Pleosporales sp
0.0993163	0.0170827	0	0	0.00907505	0	0	0	k__Fungi; p__Basidiomycota; c__Tremellomycetes; o__Tremellales; f__Incertae sedis; g__Fibulobasidium; s__Fibulobasidium inconspicuum
0.0988343	0.00485708	0.0276611	0.0118655	0	0.0152856	0.00836416	0.00249867	k__Fungi; p__Ascomycota; c__Dothideomycetes; o__Pleosporales; f__Leptosphaeriaceae; g__Coniothyrium; s__Coniothyrium glycines
0.0988343	0.111242	0.136212	0.268043	0.195918	0.226387	0.039996	0.125785	k__Fungi; p__Ascomycota; c__Dothideomycetes; o__Pleosporales; f__Phaeosphaeriaceae; g__unidentified; s__Phaeosphaeriaceae sp
0.0976283	0.0447796	0.0817744	0.136535	0.158592	0.109673	0.0289174	0.0524108	k__Fungi; p__Ascomycota; c__Dothideomycetes; o__Pleosporales; f__Phaeosphaeriaceae; g__Phaeosphaeria; s__Phaeosphaeria juncophila
0.0904946	0.298033	0.719426	0.599113	0.585731	0.240823	0.137695	0.305649	k__Fungi; p__Ascomycota; c__Leotiomycetes; o__Helotiales; f__Incertae sedis; g__unidentified; s__Incertae sedis sp
0.0892721	0.114223	0.059436	0.107282	0.233727	0.34176	0.0308495	0.209549	k__Fungi; p__Basidiomycota; c__Agaricostilbomycetes; o__Agaricostilbales; f__Agaricostilbaceae; g__Bensingtonia; s__Bensingtonia yuccicola
0.0812842	0.247785	0.201244	0.239918	0.28461	0.23518	0.0296006	0.21917	k__Fungi; p__Basidiomycota; c__unidentified; o__unidentified; f__unidentified; g__unidentified; s__Basidiomycota sp
0.0743173	0.0212046	0.146013	0.0157404	0.148272	0.0108072	0.212148	0.223434	k__Fungi; p__Basidiomycota; c__Tremellomycetes; o__Tremellales; f__Incertae sedis; g__Cryptococcus; s__Cryptococcus oeirensis
0.0672325	0.00385473	0.0145641	0	0.00819118	0.00202186	0.00165951	0	k__Fungi; p__Ascomycota; c__Incertae sedis; o__Incertae sedis; f__Incertae sedis; g__Chalara; s__Chalara sp
0.0633855	0.109025	0.164087	0.067586	0.101937	0.329244	0.0300395	0.0762546	k__Fungi; p__Basidiomycota; c__Microbotryomycetes; o__Sporidiobolales; f__Incertae sedis; g__Sporobolomyces; s__Sporobolomyces gracilis
0.0589409	0.107081	0.0572485	0.023891	0.038893	0.0561256	0.00160652	0.00806402	k__Fungi; p__Basidiomycota; c__Tremellomycetes; o__Tremellales; f__Incertae sedis; g__Hannaella; s__Hannaella kunmingensis
0.0581062	0.00752119	0.136826	0.0220123	0.0689692	0.00591746	0.0128646	0.00692361	k__Fungi; p__Ascomycota; c__Dothideomycetes; o__Dothideales; f__Dothioraceae; g__Pringsheimia; s__Pringsheimia smilacis
0.0546589	0.0639301	0.0198919	0.0420774	0.0159823	0.0177524	0	0.000967299	k__Fungi; p__Ascomycota; c__Eurotiomycetes; o__Mycocaliciales; f__Mycocaliciaceae; g__Chaenothecopsis; s__Chaenothecopsis pusiola
0.0545885	0.0410287	0.0983226	0.178538	0.140865	0.109325	0.0598461	0.0752681	k__Fungi; p__Ascomycota; c__Dothideomycetes; o__Pleosporales; f__Phaeosphaeriaceae; g__Phaeosphaeria; s__Phaeosphaeria sp
0.0507084	0	0	0	0	0	0	0	k__Fungi; p__Ascomycota; c__Eurotiomycetes; o__Eurotiales; f__Trichocomaceae; g__Aspergillus; s__Aspergillus penicillioides
0.048554	0.0219677	0.0522442	0.0385965	0.0345324	0.020384	0.00509977	0.0249506	k__Fungi; p__Ascomycota; c__Leotiomycetes; o__Helotiales; f__unidentified; g__unidentified; s__Helotiales sp
0.0454724	0.0118822	0.0226679	0.00812311	0.0639292	0.00197249	0.00187747	0.0159028	k__Fungi; p__Basidiomycota; c__Tremellomycetes; o__Tremellales; f__Incertae sedis; g__Derxomyces; s__Derxomyces pseudoschimicola
0.0423575	0.11657	0	0.00943322	0	0.0509521	0	0	k__Fungi; p__Ascomycota; c__Dothideomycetes; o__Incertae sedis; f__Incertae sedis; g__Peltaster; s__Peltaster fructicola
0.0423575	0.101999	0.0330323	0.0122717	0.0309634	0.0738806	0.0250925	0.0399787	k__Fungi; p__Basidiomycota; c__Cystobasidiomycetes; o__Cystobasidiales; f__Cystobasidiaceae; g__Cystobasidium; s__Cystobasidium pinicola
0.0405964	0.00480593	0	0.0144741	0	0	0.00187426	0	k__Fungi; p__Ascomycota; c__Eurotiomycetes; o__Eurotiales; f__Trichocomaceae; g__Aspergillus; s__Aspergillus nomius
0.0380313	0.889787	0.0887024	1.06951	0.0926698	0.787782	0.0149809	0.315178	k__Fungi; p__Ascomycota; c__Dothideomycetes; o__Capnodiales; f__Mycosphaerellaceae; g__unidentified; s__Mycosphaerellaceae sp
0.0379663	0	0	0	0	0	0.00374852	0.00335945	k__Fungi; p__Basidiomycota; c__Agaricomycetes; o__Agaricales; f__Mycenaceae; g__Mycena; s__Mycena epipterygia
0.0375062	0.0388802	0.0260218	0.0230299	0.0726004	0.00900749	0.0108119	0.0165007	k__Fungi; p__Ascomycota; c__Dothideomycetes; o__Pleosporales; f__Pleosporaceae; g__Stemphylium; s__Stemphylium herbarum
0.0360235	0	0.457386	0.00972116	0.0241119	0.00898652	0.0493369	0.015386	k__Fungi; p__Ascomycota; c__Dothideomycetes; o__Dothideales; f__Dothioraceae; g__Aureobasidium; s__Aureobasidium subglaciale
0.035834	0.00752119	0	0.0125933	0.00799115	0.00394497	0	0	k__Fungi; p__Ascomycota; c__Incertae sedis; o__Incertae sedis; f__Incertae sedis; g__Knufia; s__Knufia cryptophialidica
0.035834	0.00752119	0	0.0125933	0.00799115	0.00394497	0	0	k__Fungi; p__Ascomycota; c__Incertae sedis; o__Incertae sedis; f__Incertae sedis; g__Knufia; s__Knufia cryptophialidica
0.0336163	0.0308378	0.104862	0.268523	0.237544	0.101093	0.0282117	0.0109066	k__Fungi; p__Ascomycota; c__Dothideomycetes; o__Myriangiales; f__Elsinoaceae; g__Sphaceloma; s__Sphaceloma perseae
0.0336163	0.0308378	0.0116513	0.00695656	0.00819118	0	0	0	k__Fungi; p__Ascomycota; c__Eurotiomycetes; o__Chaetothyriales; f__Herpotrichiellaceae; g__Phaeococcomyces; s__Phaeococcomyces catenatus
0.0282384	0	0.0110108	0.0192841	0.0206423	0	0	0.00124934	k__Fungi; p__Ascomycota; c__Dothideomycetes; o__Myriangiales; f__Elsinoaceae; g__unidentified; s__Elsinoaceae sp
0.0282384	0.0339995	0.0220215	0.0555619	0.0412846	0.141885	0	0.0359755	k__Fungi; p__Basidiomycota; c__Microbotryomycetes; o__Sporidiobolales; f__Incertae sedis; g__Sporobolomyces; s__Sporobolomyces symmetricus
0.027941	0	0	0	0	0	0	0	k__Fungi; p__Ascomycota; c__Dothideomycetes; o__Capnodiales; f__Teratosphaeriaceae; g__Teratosphaeria; s__Teratosphaeria blakelyi
0.027941	0.0336415	0.028241	0.0291622	0.0715958	0.140868	0.0264347	0.0457386	k__Fungi; p__Basidiomycota; c__Agaricomycetes; o__Agaricales; f__Tricholomataceae; g__Leucopaxillus; s__Leucopaxillus giganteus
0.026385	0.0683308	0	0.0142566	0.0283625	0.0134402	0	0	k__Fungi; p__Basidiomycota; c__Exobasidiomycetes; o__Exobasidiales; f__Exobasidiaceae; g__Exobasidium; s__Exobasidium dubium
0.0253542	0.00435354	0	0	0.00925115	0	0	0	k__Fungi; p__Ascomycota; c__Dothideomycetes; o__Botryosphaeriales; f__Botryosphaeriaceae; g__Dothiorella; s__Dothiorella vidmadera
0.0253542	0	0	0	0	0.00457481	0	0	k__Fungi; p__Ascomycota; c__Leotiomycetes; o__Rhytismatales; f__Rhytismataceae; g__Lophodermium; s__Lophodermium conigenum
0.0253542	0	0.0131815	0	0	0	0	0	k__Fungi; p__Ascomycota; c__Sordariomycetes; o__Ophiostomatales; f__Ophiostomataceae; g__Raffaelea; s__Raffaelea quercivora
0.0253542	0	0.00988615	0.00472212	0.018534	0.0274488	0	0.00785213	k__Fungi; p__Ascomycota; c__Taphrinomycetes; o__Taphrinales; f__Taphrinaceae; g__Lalaria; s__Lalaria inositophila
0.0253109	0	0.013159	0.0109995	0.0185023	0.0159845	0.0294776	0.00783872	k__Fungi; p__Ascomycota; c__Dothideomycetes; o__Pleosporales; f__Leptosphaeriaceae; g__Leptosphaeria; s__Leptosphaeria sp
0.0253109	0.00820827	0.0383498	0.0136038	0.052337	0.0665864	0.00937334	0.0074538	k__Fungi; p__Ascomycota; c__Taphrinomycetes; o__Taphrinales; f__unidentified; g__unidentified; s__Taphrinales sp
0.0236089	0.0345369	0.00988615	0	0.00926698	0.00252078	0	0.00469567	k__Fungi; p__Ascomycota; c__Leotiomycetes; o__Helotiales; f__Sclerotiniaceae; g__Monilinia; s__Monilinia sp
0.0224108	0.00385473	0.0174769	0.00417393	0.106485	0.00202186	0.00663806	0	k__Fungi; p__Basidiomycota; c__Tremellomycetes; o__Cystofilobasidiales; f__Cystofilobasidiaceae; g__Itersonilia; s__Itersonilia perplexans
0.0218636	0	0	0	0	0	0	0	k__Fungi; p__Ascomycota; c__Saccharomycetes; o__Saccharomycetales; f__Saccharomycetaceae; g__Saccharomyces; s__Saccharomyces mikatae
0.0218636	0.0548413	0.0195358	0.0139691	0	0.0118349	0.0161899	0	k__Fungi; p__Basidiomycota; c__Tremellomycetes; o__Tremellales; f__Incertae sedis; g__Hannaella; s__Hannaella oryzae
0.0216952	0.0416699	0.0281981	0.0309783	0	0.00391459	0	0.00399936	k__Fungi; p__Ascomycota; c__Dothideomycetes; o__Myriangiales; f__unidentified; g__unidentified; s__Myriangiales sp
0.0216952	0	0	0	0	0	0	0	k__Fungi; p__Ascomycota; c__Eurotiomycetes; o__Chaetothyriales; f__Chaetothyriaceae; g__Cyphellophora; s__Cyphellophora vermispora
0.0141192	0	0	0.00701239	0	0.00254761	0	0.00249867	k__Fungi; p__Ascomycota; c__Dothideomycetes; o__Pleosporales; f__Incertae sedis; g__Periconia; s__Periconia macrospinosa
0.0141192	0.0135791	0.0109721	0.00903451	0.0574712	0.0116816	0	0.00633712	k__Fungi; p__Ascomycota; c__Eurotiomycetes; o__Eurotiales; f__Trichocomaceae; g__Penicillium; s__Penicillium chrysogenum
0.0141192	0	0	0.00350619	0.0103211	0	0	0	k__Fungi; p__Ascomycota; c__Sordariomycetes; o__Sordariales; f__Sordariaceae; g__Sordaria; s__Sordaria fimicola
0.0141192	0.0194283	0	0.00350619	0.0206423	0.00509521	0	0.00249867	k__Fungi; p__Basidiomycota; c__Microbotryomycetes; o__Sporidiobolales; f__Incertae sedis; g__Sporobolomyces; s__Sporobolomyces salicinus
0.0139705	0	0.0798951	0.00346927	0	0	0.0103451	0.00741707	k__Fungi; p__Ascomycota; c__Dothideomycetes; o__Dothideales; f__Dothioraceae; g__Sydowia; s__Sydowia japonica
0.0139705	0.00480593	0.0396444	0.11089	0.0714871	0.0580047	0.00413804	0.0392613	k__Fungi; p__Ascomycota; c__Dothideomycetes; o__Pleosporales; f__Phaeosphaeriaceae; g__Phaeosphaeria; s__Phaeosphaeria triglochinicola
0.0139705	0.0145201	0.0036316	0.0383281	0	0.0355592	0	0.0224354	k__Fungi; p__Ascomycota; c__Eurotiomycetes; o__Chaetothyriales; f__Incertae sedis; g__Strelitziana; s__Strelitziana albiziae
0.0139705	0.0181532	0.00726319	0.0423971	0.0102124	0.0322066	0.00413804	0.00865325	k__Fungi; p__Basidiomycota; c__Incertae sedis; o__Malasseziales; f__Malasseziaceae; g__Malassezia; s__Malassezia slooffiae
0.0126771	0	0.0131815	0.00157404	0	0.0022874	0.0187747	0.0415041	k__Fungi; p__Ascomycota; c__Dothideomycetes; o__Dothideales; f__Dothideaceae; g__Dothidea; s__Dothidea sp
0.0126771	0	0.00329538	0.00314808	0	0	0	0.00224347	k__Fungi; p__Ascomycota; c__Eurotiomycetes; o__Eurotiales; f__Trichocomaceae; g__Aspergillus; s__Aspergillus amstelodami
0.0126771	0	0	0.00157404	0	0	0	0	k__Fungi; p__Ascomycota; c__Incertae sedis; o__Incertae sedis; f__Incertae sedis; g__Torula; s__Torula caligans
0.0126771	0	0	0	0	0	0	0.00112173	k__Fungi; p__Ascomycota; c__Lecanoromycetes; o__Teloschistales; f__Teloschistaceae; g__Austroplaca; s__Austroplaca erecta
0.0126771	0	0	0.00157404	0	0	0	0	k__Fungi; p__Ascomycota; c__Sordariomycetes; o__Hypocreales; f__Hypocreaceae; g__unidentified; s__Hypocreaceae sp
0.0126771	0.0298976	0.0310515	0.0626863	0.0793907	0.103547	0.00321304	0.032195	k__Fungi; p__Basidiomycota; c__Agaricostilbomycetes; o__Agaricostilbales; f__Kondoaceae; g__Kondoa; s__Kondoa malvinella
0.0126554	0.0130606	0.00328976	0	0	0	0	0	k__Fungi; p__Ascomycota; c__Lecanoromycetes; o__Lecanorales; f__Ramalinaceae; g__Biatora; s__Biatora vernalis
0.0126554	0.0174142	0.0296078	0.0219989	0.0185023	0.0593709	0	0.0111982	k__Fungi; p__Basidiomycota; c__Tremellomycetes; o__Tremellales; f__Incertae sedis; g__Dioszegia; s__Dioszegia takashimae
0.0124145	0.0213534	0.0161357	0.0667053	0.0181501	0.0336004	0.00551575	0.0230685	k__Fungi; p__Ascomycota; c__Dothideomycetes; o__Incertae sedis; f__Incertae sedis; g__Leptospora; s__Leptospora rubella
0.0124145	0.00854134	0	0	0	0	0	0	k__Fungi; p__Ascomycota; c__Lecanoromycetes; o__Lecanorales; f__Parmeliaceae; g__Usnea; s__Usnea fragilescens
0.0124145	0	0.00886675	0.00308288	0	0.00224003	0	0.0010985	k__Fungi; p__Ascomycota; c__Sordariomycetes; o__Xylariales; f__Amphisphaeriaceae; g__Seiridium; s__Seiridium podocarpi
0.0112054	0.00485708	0.0073405	0	0.0103211	0.00509521	0.00663806	0.000991512	k__Fungi; p__Ascomycota; c__Dothideomycetes; o__Pleosporales; f__Incertae sedis; g__Phaeomycocentrospora; s__Phaeomycocentrospora cantuariensis
0.0112054	0.078187	0.0296422	0.0330316	0.0638778	0.0347153	0.00161899	0.0189083	k__Fungi; p__Ascomycota; c__Dothideomycetes; o__Pleosporales; f__Pleosporaceae; g__Alternaria; s__Alternaria sp
0.0112054	0	0.00873847	0.00269376	0	0.00202186	0	0	k__Fungi; p__Ascomycota; c__Taphrinomycetes; o__Taphrinales; f__Taphrinaceae; g__Taphrina; s__Taphrina padi
0.0112054	0.0154189	0.0233026	0.0292175	0.0491471	0.0363935	0.00497854	0.0267708	k__Fungi; p__Basidiomycota; c__Agaricostilbomycetes; o__Agaricostilbales; f__Agaricostilbaceae; g__Bensingtonia; s__Bensingtonia subrosea
0.0112054	0.0173213	0.00873847	0.00407201	0.0325647	0.0125807	0.00489749	0.00391762	k__Fungi; p__Basidiomycota; c__Tremellomycetes; o__Tremellales; f__Incertae sedis; g__Cryptococcus; s__Cryptococcus flavus
0.0112054	0	0.00582565	0	0.0327647	0	0.633934	0.00297454	k__Fungi; p__Basidiomycota; c__Tremellomycetes; o__Cystofilobasidiales; f__Incertae sedis; g__Mrakiella; s__Mrakiella aquatica
0.0109318	0.0112818	0	0.0135734	0	0.0138074	0	0.0038692	k__Fungi; p__Ascomycota; c__Dothideomycetes; o__Capnodiales; f__Teratosphaeriaceae; g__Teratosphaeria; s__Teratosphaeria sp
0.0109318	0.0112818	0.0272973	0.0549438	0.055938	0.0022874	0.00161899	0.0232003	k__Fungi; p__Ascomycota; c__Dothideomycetes; o__Pleosporales; f__Incertae sedis; g__Peyronellaea; s__Peyronellaea sp
0.0109318	0	0.00284169	0	0	0.00788994	0	0.000967299	k__Fungi; p__Ascomycota; c__Dothideomycetes; o__Pleosporales; f__Leptosphaeriaceae; g__Subplenodomus; s__Subplenodomus apiicola
0.0109318	0	0	0.00135734	0	0	0	0	k__Fungi; p__Ascomycota; c__Dothideomycetes; o__Pleosporales; f__Phaeosphaeriaceae; g__Sclerostagonospora; s__Sclerostagonospora phragmiticola
0.0109318	0.00376059	0.0174982	0.0265543	0.223752	0.0275844	0	0.000967299	k__Fungi; p__Ascomycota; c__Eurotiomycetes; o__Chaetothyriales; f__Herpotrichiellaceae; g__unidentified; s__Herpotrichiellaceae sp
0.0109318	0	0	0.00135734	0.0079296	0	0	0.000959849	k__Fungi; p__Ascomycota; c__Leotiomycetes; o__Incertae sedis; f__Myxotrichaceae; g__Pseudogymnoascus; s__Pseudogymnoascus destructans
0.0109318	0	0.00329538	0.00314808	0	0.00815748	0	0.0030331	k__Fungi; p__Basidiomycota; c__Microbotryomycetes; o__Sporidiobolales; f__Incertae sedis; g__Rhodotorula; s__Rhodotorula glutinis
0.0108476	0.00746326	0.0197387	0.00538753	0	0.00195729	0.00481956	0.00575909	k__Fungi; p__Ascomycota; c__Dothideomycetes; o__Pleosporales; f__Pleosporaceae; g__Pyrenophora; s__Pyrenophora tritici-repentis
0.0108476	0	0.00281981	0	0	0	0	0	k__Fungi; p__Ascomycota; c__Lecanoromycetes; o__Lecanorales; f__Lecanoraceae; g__Lecanora; s__Lecanora swartzii
0.0108476	0.00436099	0	0	0.0343932	0.0022874	0	0	k__Fungi; p__Ascomycota; c__Leotiomycetes; o__Helotiales; f__Sclerotiniaceae; g__Ciboria; s__Ciboria batschiana
0.0108476	0	0	0	0	0.00195729	0	0	k__Fungi; p__Ascomycota; c__Leotiomycetes; o__Helotiales; f__Sclerotiniaceae; g__Monilinia; s__Monilinia baccarum
0.0108476	0.00373163	0.00281981	0	0	0.00195729	0	0	k__Fungi; p__Basidiomycota; c__Tremellomycetes; o__Tremellales; f__Incertae sedis; g__Bullera; s__Bullera dendrophila
0.0108476	0.0223898	0.0197387	0.0364547	0.0237888	0.0554566	0.0337369	0.144937	k__Fungi; p__Basidiomycota; c__Tremellomycetes; o__Tremellales; f__Incertae sedis; g__Bulleromyces; s__Bulleromyces albus
0	0	0	0.00271467	0	0	0.00161899	0	k__Fungi; p__Ascomycota; c__Dothideomycetes; o__Botryosphaeriales; f__Botryosphaeriaceae; g__Diplodia; s__Diplodia subglobosa
0	19.7387	0	0	0	0.00252078	0	0	k__Fungi; p__Ascomycota; c__Saccharomycetes; o__Saccharomycetales; f__Saccharomycodaceae; g__Hanseniaspora; s__Hanseniaspora uvarum
0	0.00854134	0	0	0	0	0	0	k__Fungi; p__Ascomycota; c__Dothideomycetes; o__Botryosphaeriales; f__Botryosphaeriaceae; g__Phyllosticta; s__Phyllosticta citricarpa
0	0	0	0.0017531	0.0206423	0.012738	0.00900164	0.00124934	k__Fungi; p__Ascomycota; c__Dothideomycetes; o__Botryosphaeriales; f__Incertae sedis; g__Camarosporium; s__Camarosporium sp
0	0.00480593	0.00726319	0.0104078	0.0102124	0	0	0	k__Fungi; p__Ascomycota; c__Dothideomycetes; o__Botryosphaeriales; f__unidentified; g__unidentified; s__Botryosphaeriales sp
0	0.0255656	0	0.051297	0	0.0159644	0	0.0266693	k__Fungi; p__Ascomycota; c__Dothideomycetes; o__Capnodiales; f__Davidiellaceae; g__Cladosporium; s__Cladosporium fusiforme
0	0	0	0.00278262	0	0	0	0	k__Fungi; p__Ascomycota; c__Dothideomycetes; o__Capnodiales; f__Davidiellaceae; g__Cladosporium; s__Cladosporium sp
0	0	0.0200177	0.0190341	0.0240504	0.00195729	0	0.00678227	k__Fungi; p__Ascomycota; c__Dothideomycetes; o__Capnodiales; f__Incertae sedis; g__Arthrocatena; s__Arthrocatena tenebrio
0	0	0	0.00271467	0	0	0	0	k__Fungi; p__Ascomycota; c__Dothideomycetes; o__Capnodiales; f__Incertae sedis; g__Capnobotryella; s__Capnobotryella sp
0	0	0	0.00616576	0	0	0	0.002197	k__Fungi; p__Ascomycota; c__Dothideomycetes; o__Capnodiales; f__Incertae sedis; g__Toxicocladosporium; s__Toxicocladosporium rubrigenum
0	0.134566	0.0036316	0.37866	0	0.412608	0	0.102488	k__Fungi; p__Ascomycota; c__Dothideomycetes; o__Capnodiales; f__Mycosphaerellaceae; g__Dissoconium; s__Dissoconium eucalypti
0	0	0	0	0	0.00913398	0	0	k__Fungi; p__Ascomycota; c__Dothideomycetes; o__Capnodiales; f__Mycosphaerellaceae; g__Dothistroma; s__Dothistroma pini
0	0.00427067	0	0	0	0.00896011	0	0	k__Fungi; p__Ascomycota; c__Dothideomycetes; o__Capnodiales; f__Mycosphaerellaceae; g__Mycosphaerella; s__Mycosphaerella sp
0	14.3841	0	0	0	0	0	0	k__Fungi; p__Ascomycota; c__Dothideomycetes; o__Capnodiales; f__Mycosphaerellaceae; g__Ramichloridium; s__Ramichloridium ducassei
0	0.0139654	0.0036316	0.00487734	0	0.0111065	0.00528206	0.00220348	k__Fungi; p__Ascomycota; c__Dothideomycetes; o__Capnodiales; f__Mycosphaerellaceae; g__Phaeoramularia; s__Phaeoramularia weigelicola
0	0.011318	0.00563962	0.0263167	0	0.0176156	0	0.00479925	k__Fungi; p__Ascomycota; c__Dothideomycetes; o__Capnodiales; f__Mycosphaerellaceae; g__Pseudocercosporella; s__Pseudocercosporella chaenomelis
0	0.0261213	0.00328976	0.0490754	0	0.0621952	0	0.0156774	k__Fungi; p__Ascomycota; c__Dothideomycetes; o__Capnodiales; f__Mycosphaerellaceae; g__Pseudocercosporella; s__Pseudocercosporella sp
0	0	0	17.7259	0	0.00656449	0	0	k__Fungi; p__Ascomycota; c__Sordariomycetes; o__Hypocreales; f__Nectriaceae; g__Fusarium; s__Fusarium fujikuroi
0	0.00870709	0	0.00308288	0	0	0	0.00224347	k__Fungi; p__Ascomycota; c__Dothideomycetes; o__Capnodiales; f__Mycosphaerellaceae; g__Ramularia; s__Ramularia cynarae
0	0	0.0110108	0	0.0309634	0	0.00209104	0	k__Fungi; p__Ascomycota; c__Dothideomycetes; o__Capnodiales; f__Mycosphaerellaceae; g__Septoria; s__Septoria arundinacea
0	0.041048	0.0169188	0.0821598	0.0475776	0.119425	0.00481956	0.0307152	k__Fungi; p__Ascomycota; c__Dothideomycetes; o__Capnodiales; f__Mycosphaerellaceae; g__Septoria; s__Septoria cretae
0	0.0609496	0.00986927	0.175563	0.0555069	0.0707884	0	0.00111982	k__Fungi; p__Ascomycota; c__Dothideomycetes; o__Capnodiales; f__Mycosphaerellaceae; g__Sphaerulina; s__Sphaerulina amelanchier
0	0	0	0.00278262	0	0	0	0	k__Fungi; p__Ascomycota; c__Dothideomycetes; o__Capnodiales; f__Mycosphaerellaceae; g__Sphaerulina; s__Sphaerulina pseudovirgaureae
0	0	0	0.00407201	0	0.00394497	0	0.0029019	k__Fungi; p__Ascomycota; c__Dothideomycetes; o__Capnodiales; f__Mycosphaerellaceae; g__Stenella; s__Stenella araguata
0	5.41611	0	0	0	0	0	0	k__Fungi; p__Ascomycota; c__Sordariomycetes; o__Hypocreales; f__Hypocreaceae; g__Trichoderma; s__Trichoderma alni
0	0	0	0.00139131	0	0	0	0.00198302	k__Fungi; p__Ascomycota; c__Dothideomycetes; o__Capnodiales; f__Mycosphaerellaceae; g__Xenomycosphaerella; s__Xenomycosphaerella elongata
0	0.00376059	0.00322713	0.0075231	0	0.00896011	0	0	k__Fungi; p__Ascomycota; c__Dothideomycetes; o__Capnodiales; f__Teratosphaeriaceae; g__Catenulostroma; s__Catenulostroma hermanusense
0	0.0145712	0.00367025	0.0225786	0.0206423	0.0455493	0	0.0137427	k__Fungi; p__Ascomycota; c__Dothideomycetes; o__Capnodiales; f__Teratosphaeriaceae; g__Teratosphaeria; s__Teratosphaeria capensis
0	0	0	0.00314808	0	0	0	0	k__Fungi; p__Ascomycota; c__Dothideomycetes; o__Dothideales; f__Dothideaceae; g__Dothidea; s__Dothidea sambuci
0	0	0.00582565	0	0	0	0	0	k__Fungi; p__Ascomycota; c__Dothideomycetes; o__Dothideales; f__Dothioraceae; g__Aureobasidium; s__Aureobasidium iranianum
0	0	0	0.00314808	0	0	0	0	k__Fungi; p__Ascomycota; c__Dothideomycetes; o__Dothideales; f__Dothioraceae; g__Aureobasidium; s__Aureobasidium namibiae
0	0	0	0.00314808	0	0	0	0.00224347	k__Fungi; p__Ascomycota; c__Dothideomycetes; o__Dothideales; f__Dothioraceae; g__unidentified; s__Dothioraceae sp
0	0	0	0.00314808	0	0	0	0	k__Fungi; p__Ascomycota; c__Dothideomycetes; o__Hysteriales; f__Gloniaceae; g__Cenococcum; s__Cenococcum sp
0	0.00870709	0	0	0	0	0	0	k__Fungi; p__Ascomycota; c__Dothideomycetes; o__Hysteriales; f__unidentified; g__unidentified; s__Hysteriales sp
0	0.0642141	0.00659077	0.0141664	0.0556019	0.00914961	0	0.0043325	k__Fungi; p__Ascomycota; c__Dothideomycetes; o__Incertae sedis; f__Incertae sedis; g__Peltaster; s__Peltaster cerophilus
0	0.0154189	0.00291282	0.0135091	0	0.0415915	0.00209104	0.00965792	k__Fungi; p__Ascomycota; c__Dothideomycetes; o__Incertae sedis; f__Incertae sedis; g__Zymoseptoria; s__Zymoseptoria halophila
0	0	0	0.00814401	0.00799115	0.0118349	0	0	k__Fungi; p__Ascomycota; c__Dothideomycetes; o__Incertae sedis; f__Incertae sedis; g__Zymoseptoria; s__Zymoseptoria verkleyi
0	0	0	0	0	0.00224003	0.00183858	0	k__Fungi; p__Ascomycota; c__Dothideomycetes; o__Myriangiales; f__Elsinoaceae; g__Sphaceloma; s__Sphaceloma erythrinae
0	0.00746326	0	0.00134688	0	0	0.00160652	0	k__Fungi; p__Ascomycota; c__Dothideomycetes; o__Myriangiales; f__Incertae sedis; g__Endosporium; s__Endosporium aviarium
0	0	0	0.00139131	0	0	0	0.00297454	k__Fungi; p__Ascomycota; c__Dothideomycetes; o__Pleosporales; f__Cucurbitariaceae; g__Curreya; s__Curreya grandicipis
0	0	0.0145264	0.0260195	0	0.00756233	0	0.00247236	k__Fungi; p__Ascomycota; c__Dothideomycetes; o__Pleosporales; f__Cucurbitariaceae; g__Pyrenochaetopsis; s__Pyrenochaetopsis sp
0	0.00427067	0	0.00924865	0	0.00224003	0	0.00988651	k__Fungi; p__Ascomycota; c__Dothideomycetes; o__Pleosporales; f__Incertae sedis; g__Ascochyta; s__Ascochyta hordei
0	0	0.0036316	0.00346927	0	0	0	0	k__Fungi; p__Ascomycota; c__Dothideomycetes; o__Pleosporales; f__Incertae sedis; g__Ascochyta; s__Ascochyta skagwayensis
0	0	0	0	0	0	0	0.00247236	k__Fungi; p__Ascomycota; c__Dothideomycetes; o__Pleosporales; f__Incertae sedis; g__Didymella; s__Didymella fabae
0	0	0.0073405	0	0	0	0	0	k__Fungi; p__Ascomycota; c__Dothideomycetes; o__Pleosporales; f__Incertae sedis; g__Didymella; s__Didymella sp
0	0	0.00284169	0.00135734	0.00799115	0	0	0.000967299	k__Fungi; p__Ascomycota; c__Dothideomycetes; o__Pleosporales; f__Incertae sedis; g__Didymella; s__Didymella vitalbina
0	0.0485112	0	0	0	0	0	0	k__Fungi; p__Ascomycota; c__Dothideomycetes; o__Pleosporales; f__Incertae sedis; g__Letendraea; s__Letendraea sp
0	0	0	0.00139131	0.00819118	0	0	0.00396605	k__Fungi; p__Ascomycota; c__Dothideomycetes; o__Pleosporales; f__Incertae sedis; g__Paraphoma; s__Paraphoma sp
0	0.00870709	0.0197385	0.00942812	0.00925115	0	0	0.00559909	k__Fungi; p__Ascomycota; c__Dothideomycetes; o__Pleosporales; f__Incertae sedis; g__Periconia; s__Periconia byssoides
0	0.00485708	0.0623943	0.00350619	0	0.012738	0	0	k__Fungi; p__Ascomycota; c__Dothideomycetes; o__Pleosporales; f__Incertae sedis; g__Periconia; s__Periconia sp
0	0	0.0073405	0.0105186	0	0	0	0	k__Fungi; p__Ascomycota; c__Dothideomycetes; o__Pleosporales; f__Incertae sedis; g__Phoma; s__Phoma huancayensis
0	0	0.0036316	0	0	0.00448006	0	0.00247236	k__Fungi; p__Ascomycota; c__Dothideomycetes; o__Pleosporales; f__Incertae sedis; g__Phoma; s__Phoma sp
0	0	0.0137948	0.0389486	0	0.00254761	0	0	k__Fungi; p__Ascomycota; c__Dothideomycetes; o__Pleosporales; f__Incertae sedis; g__Pyrenochaeta; s__Pyrenochaeta sp
0	0	0	0	0	0	0	0.00223963	k__Fungi; p__Ascomycota; c__Dothideomycetes; o__Pleosporales; f__Incertae sedis; g__Setomelanomma; s__Setomelanomma holmii
0	0	0.0096814	0.00288832	0.0181501	0.00839464	0	0	k__Fungi; p__Ascomycota; c__Dothideomycetes; o__Pleosporales; f__Leptosphaeriaceae; g__Acicuseptoria; s__Acicuseptoria rumicis
0	0.012812	0.0299544	0.0534664	0.0374376	0.0656117	0	0.0144182	k__Fungi; p__Ascomycota; c__Dothideomycetes; o__Pleosporales; f__Leptosphaeriaceae; g__Coniothyrium; s__Coniothyrium sp
0	0	0	0	0.0317184	0	0	0	k__Fungi; p__Ascomycota; c__Dothideomycetes; o__Pleosporales; f__Leptosphaeriaceae; g__Leptosphaeria; s__Leptosphaeria avenaria
0	0	0	0.00673441	0	0.00195729	0	0	k__Fungi; p__Ascomycota; c__Dothideomycetes; o__Pleosporales; f__Leptosphaeriaceae; g__Leptosphaeria; s__Leptosphaeria proteicola
0	0.00436099	0	0	0	0	0.00375494	0	k__Fungi; p__Ascomycota; c__Dothideomycetes; o__Pleosporales; f__Leptosphaeriaceae; g__Leptosphaeria; s__Leptosphaeria rubefaciens
0	0.00854134	0	0	0	0	0	0.0032955	k__Fungi; p__Ascomycota; c__Dothideomycetes; o__Pleosporales; f__Leptosphaeriaceae; g__Leptosphaeria; s__Leptosphaeria slovacica
0	0	0.0036316	0.00173463	0	0	0	0.00988943	k__Fungi; p__Ascomycota; c__Dothideomycetes; o__Pleosporales; f__Leptosphaeriaceae; g__Neosetophoma; s__Neosetophoma sp
0	0	0	0.00157135	0.00925115	0	0	0	k__Fungi; p__Ascomycota; c__Dothideomycetes; o__Pleosporales; f__Leptosphaeriaceae; g__Plenodomus; s__Plenodomus agnitus
0	0	0.014681	0.0122717	0.0103211	0.0101904	0	0.00499734	k__Fungi; p__Ascomycota; c__Dothideomycetes; o__Pleosporales; f__Leptosphaeriaceae; g__Plenodomus; s__Plenodomus collinsoniae
0	0	0.0036316	0.00346927	0.0102124	0.0176454	0.00206902	0	k__Fungi; p__Ascomycota; c__Dothideomycetes; o__Pleosporales; f__Leptosphaeriaceae; g__Subplenodomus; s__Subplenodomus apiicola
0	0	0	0.00950135	0	0.0256423	0.00485697	0.019346	k__Fungi; p__Ascomycota; c__Dothideomycetes; o__Pleosporales; f__Leptosphaeriaceae; g__unidentified; s__Leptosphaeriaceae sp
0	0.0186582	0.0197387	0.00673441	0.0158592	0.00195729	0.00321304	0.00479925	k__Fungi; p__Ascomycota; c__Dothideomycetes; o__Pleosporales; f__Lophiostomataceae; g__Lophiostoma; s__Lophiostoma macrostomum
0	0.00961185	0.00726319	0.00346927	0.0102124	0.00252078	0	0	k__Fungi; p__Ascomycota; c__Dothideomycetes; o__Pleosporales; f__Lophiostomataceae; g__Sigarispora; s__Sigarispora arundinis
0	0.00971416	0.029362	0.0122717	0.0619268	0.00509521	0.00627312	0.0124934	k__Fungi; p__Ascomycota; c__Dothideomycetes; o__Pleosporales; f__Montagnulaceae; g__Paraphaeosphaeria; s__Paraphaeosphaeria michotii
0	0	0	0.00404065	0	0	0	0	k__Fungi; p__Ascomycota; c__Dothideomycetes; o__Pleosporales; f__Montagnulaceae; g__Paraphaeosphaeria; s__Paraphaeosphaeria pilleata
0	0	0	0.00135734	0.00799115	0.00197249	0	0.0019346	k__Fungi; p__Ascomycota; c__Dothideomycetes; o__Pleosporales; f__Montagnulaceae; g__unidentified; s__Montagnulaceae sp
0	0	0	0	0.0159823	0	0	0	k__Fungi; p__Ascomycota; c__Dothideomycetes; o__Pleosporales; f__Phaeosphaeriaceae; g__Ampelomyces; s__Ampelomyces quisqualis
0	0	0	0.00173463	0	0	0	0.00247236	k__Fungi; p__Ascomycota; c__Dothideomycetes; o__Pleosporales; f__Phaeosphaeriaceae; g__Phaeosphaeria; s__Phaeosphaeria oreochloae
0	0.00373163	0.0563962	0	0.0079296	0.0156584	0	0	k__Fungi; p__Ascomycota; c__Dothideomycetes; o__Pleosporales; f__Phaeosphaeriaceae; g__Sclerostagonospora; s__Sclerostagonospora cycadis
0	0	0	0	0	0.00504155	0	0	k__Fungi; p__Ascomycota; c__Dothideomycetes; o__Pleosporales; f__Phaeosphaeriaceae; g__Sclerostagonospora; s__Sclerostagonospora sp
0	0	0	0.00538753	0	0.00587188	0.00321304	0.000959849	k__Fungi; p__Ascomycota; c__Dothideomycetes; o__Pleosporales; f__Phaeosphaeriaceae; g__Setophaeosphaeria; s__Setophaeosphaeria badalingensis
0	0	0	0.00139131	0	0	0	0.000991512	k__Fungi; p__Ascomycota; c__Dothideomycetes; o__Pleosporales; f__Phaeosphaeriaceae; g__Stagonospora; s__Stagonospora perfecta
0	0.0312707	0.0259607	0.0303574	0.0319646	0.0141184	0.0147905	0.00993539	k__Fungi; p__Ascomycota; c__Dothideomycetes; o__Pleosporales; f__Phaeosphaeriaceae; g__Stagonospora; s__Stagonospora pseudovitensis
0	0	0	0.00135734	0	0.00197249	0	0	k__Fungi; p__Ascomycota; c__Dothideomycetes; o__Pleosporales; f__Phaeosphaeriaceae; g__Stagonospora; s__Stagonospora sp
0	0.0201884	0.0145641	4.40022	0.00819118	0.186097	0.0034981	0.00495756	k__Fungi; p__Ascomycota; c__Eurotiomycetes; o__Eurotiales; f__Trichocomaceae; g__Aspergillus; s__Aspergillus flavus
0	0	0.00281981	0.00942817	0	0.00391459	0	0	k__Fungi; p__Ascomycota; c__Dothideomycetes; o__Pleosporales; f__Pleosporaceae; g__Alternaria; s__Alternaria cinerariae
0	0	0	0.00314808	0	0	0	0	k__Fungi; p__Ascomycota; c__Dothideomycetes; o__Pleosporales; f__Pleosporaceae; g__Alternaria; s__Alternaria metachromatica
0	0	0	0.00309998	0	0.0045049	0	0	k__Fungi; p__Ascomycota; c__Dothideomycetes; o__Pleosporales; f__Pleosporaceae; g__Alternaria; s__Alternaria planifunda
0	0.00385473	0.00291282	0	0	0	0	0	k__Fungi; p__Ascomycota; c__Dothideomycetes; o__Pleosporales; f__Pleosporaceae; g__Bipolaris; s__Bipolaris eleusines
0	0	0.0108948	0	0	0.00252078	0	0	k__Fungi; p__Ascomycota; c__Dothideomycetes; o__Pleosporales; f__Pleosporaceae; g__Dendryphion; s__Dendryphion europaeum
0	0.00746326	0.00563962	0.0163871	0.029676	0.0137011	0	0.00479925	k__Fungi; p__Ascomycota; c__Dothideomycetes; o__Pleosporales; f__Pleosporaceae; g__Epicoccum; s__Epicoccum nigrum
0	0	0.00367025	0	0	0	0.00209104	0.00124934	k__Fungi; p__Ascomycota; c__Dothideomycetes; o__Pleosporales; f__Pleosporaceae; g__Pleospora; s__Pleospora bjoerlingii
0	0	0.0129712	0.00308288	0.0159823	0	0.00187426	0	k__Fungi; p__Ascomycota; c__Dothideomycetes; o__Pleosporales; f__Pleosporaceae; g__Pyrenophora; s__Pyrenophora graminea
0	0	0	0.00314271	0	0.0022835	0.00187426	0	k__Fungi; p__Ascomycota; c__Dothideomycetes; o__Pleosporales; f__Pleosporaceae; g__Pyrenophora; s__Pyrenophora lolii
0	0.0118822	0.00329538	0.00586275	0.0648688	0.0022874	0	0.00224347	k__Fungi; p__Ascomycota; c__Dothideomycetes; o__Pleosporales; f__Pleosporaceae; g__Ulocladium; s__Ulocladium chartarum
0	0.00872199	0	0.00314808	0	0.0022874	0.00187747	0.0033652	k__Fungi; p__Ascomycota; c__Dothideomycetes; o__Pleosporales; f__Pleosporaceae; g__unidentified; s__Pleosporaceae sp
0	0.00385473	0.00291282	0	0	0	0	0	k__Fungi; p__Ascomycota; c__Dothideomycetes; o__Pleosporales; f__Sporormiaceae; g__unidentified; s__Sporormiaceae sp
0	0.00870709	0.0197385	0.00785676	0.0370046	0.0022835	0.00187426	0.00111982	k__Fungi; p__Ascomycota; c__Eurotiomycetes; o__Chaetothyriales; f__Herpotrichiellaceae; g__Phaeococcomyces; s__Phaeococcomyces nigricans
0	0.00480593	0	0.00173463	0	0	0	0	k__Fungi; p__Ascomycota; c__Eurotiomycetes; o__Chaetothyriales; f__Herpotrichiellaceae; g__Phaeomoniella; s__Phaeomoniella zymoides
0	0	0	0	0	0	0	0.0019346	k__Fungi; p__Ascomycota; c__Eurotiomycetes; o__Eurotiales; f__Trichocomaceae; g__Aspergillus; s__Aspergillus bombycis
0	0.00870709	0	0	0	0	0	0	k__Fungi; p__Ascomycota; c__Eurotiomycetes; o__Eurotiales; f__Trichocomaceae; g__Aspergillus; s__Aspergillus niger
0	0	0	0.00678668	0	0	0	0	k__Fungi; p__Ascomycota; c__Eurotiomycetes; o__Eurotiales; f__Trichocomaceae; g__Penicillium; s__Penicillium bialowiezense
0	0.00376059	0.0142085	0.0352907	0	0.0749544	0.00323798	0.0029019	k__Fungi; p__Ascomycota; c__Eurotiomycetes; o__Eurotiales; f__Trichocomaceae; g__Penicillium; s__Penicillium capsulatum
0	0.00480593	0	0	0	0.00252078	0	0	k__Fungi; p__Ascomycota; c__Eurotiomycetes; o__Eurotiales; f__Trichocomaceae; g__Penicillium; s__Penicillium sp
0	0.030527	0	0	0	0	0	0	k__Fungi; p__Ascomycota; c__Eurotiomycetes; o__Eurotiales; f__Trichocomaceae; g__Talaromyces; s__Talaromyces calidicanius
0	0	0	0.00556525	0	0.00606558	0	0.00198302	k__Fungi; p__Ascomycota; c__Eurotiomycetes; o__Incertae sedis; f__Incertae sedis; g__Sarcinomyces; s__Sarcinomyces sp
0	0.0263242	0.00852508	0.0108587	0.0319646	0.00788994	0	0	k__Fungi; p__Ascomycota; c__Eurotiomycetes; o__Incertae sedis; f__Incertae sedis; g__Sarcinomyces; s__Sarcinomyces sp
0	0.0150424	0	0.00135734	0	0	0	0	k__Fungi; p__Ascomycota; c__Eurotiomycetes; o__Incertae sedis; f__Incertae sedis; g__Sarcinomyces; s__Sarcinomyces sp
0	0	0	0.00173463	0.0306373	0	0.00206902	0	k__Fungi; p__Ascomycota; c__Eurotiomycetes; o__Onygenales; f__Onygenaceae; g__Nannizziopsis; s__Nannizziopsis vriesii
0	0	0	0.00139131	0	0	0	0.000991512	k__Fungi; p__Ascomycota; c__Eurotiomycetes; o__Pyrenulales; f__Massariaceae; g__Massaria; s__Massaria anomia
0	0	0	0.00350619	0	0	0	0	k__Fungi; p__Ascomycota; c__Incertae sedis; o__Incertae sedis; f__Incertae sedis; g__Abrothallus; s__Abrothallus suecicus
0	0	0	0.00314808	0.0204249	0.0144245	0.00187747	0.00123618	k__Fungi; p__Ascomycota; c__Incertae sedis; o__Incertae sedis; f__Incertae sedis; g__Chaetosphaeronema; s__Chaetosphaeronema sp
0	0.00485708	0.00367025	0.0148789	0	0.00676746	0	0.00698299	k__Fungi; p__Ascomycota; c__Incertae sedis; o__Incertae sedis; f__Incertae sedis; g__Ochroconis; s__Ochroconis sp
0	0	0	0	0	0	0.00375494	0	k__Fungi; p__Ascomycota; c__Lecanoromycetes; o__Lecanorales; f__Parmeliaceae; g__Melanelia; s__Melanelia subaurifera
0	0.00854134	0.00322713	0	0.0181501	0.00224003	0	0	k__Fungi; p__Ascomycota; c__Lecanoromycetes; o__Lecanorales; f__Parmeliaceae; g__Melanohalea; s__Melanohalea exasperata
0	0.0111949	0.00563962	0.00404065	0	0.00195729	0	0	k__Fungi; p__Ascomycota; c__Lecanoromycetes; o__Lecanorales; f__Parmeliaceae; g__unidentified; s__Parmeliaceae sp
0	0	0	0	0.0204249	0.00252078	0	0	k__Fungi; p__Ascomycota; c__Lecanoromycetes; o__Lecanorales; f__Parmeliaceae; g__Usnea; s__Usnea crocata
0	0.012812	0.0129085	0	0	0.0156802	0	0	k__Fungi; p__Ascomycota; c__Lecanoromycetes; o__Lecanorales; f__Parmeliaceae; g__Usnea; s__Usnea mutabilis
0	0.0601695	0	0	0	0	0	0	k__Fungi; p__Ascomycota; c__Lecanoromycetes; o__Lecanorales; f__Parmeliaceae; g__Usnea; s__Usnea sp
0	0	0	0.00135734	0	0.00197249	0	0	k__Fungi; p__Ascomycota; c__Lecanoromycetes; o__Ostropales; f__Stictidaceae; g__Carestiella; s__Carestiella socia
0	0.00435354	0	0	0.00925115	0	0	0	k__Fungi; p__Ascomycota; c__Lecanoromycetes; o__Peltigerales; f__Lobariaceae; g__Pseudocyphellaria; s__Pseudocyphellaria neglecta
0	0	0	0.00135734	0	0	0	0.000967299	k__Fungi; p__Ascomycota; c__Lecanoromycetes; o__Teloschistales; f__Caliciaceae; g__Amandinea; s__Amandinea punctata
0	0	0.0036316	0	0	0.00252078	0	0	k__Fungi; p__Ascomycota; c__Lecanoromycetes; o__Teloschistales; f__Physciaceae; g__Physcia; s__Physcia stellaris
0	0	0.00328976	0.00628541	0	0	0	0	k__Fungi; p__Ascomycota; c__Lecanoromycetes; o__Teloschistales; f__Physciaceae; g__Rinodina; s__Rinodina pyrina
0	0	0	0	0	0	0.00323798	0	k__Fungi; p__Ascomycota; c__Leotiomycetes; o__Erysiphales; f__Erysiphaceae; g__Blumeria; s__Blumeria graminis
0	0	0.00582565	0	0	0	0	0	k__Fungi; p__Ascomycota; c__Leotiomycetes; o__Erysiphales; f__Erysiphaceae; g__Neoerysiphe; s__Neoerysiphe galeopsidis
0	0	0.0122191	0	0.0185023	0	0.00374852	0	k__Fungi; p__Ascomycota; c__Leotiomycetes; o__Erysiphales; f__Erysiphaceae; g__Neoerysiphe; s__Neoerysiphe galii
0	0	0.0110108	0.00701239	0	0	0.00418208	0	k__Fungi; p__Ascomycota; c__Leotiomycetes; o__Helotiales; f__Dermateaceae; g__Mollisia; s__Mollisia cinerea
0	0.111713	0	0.0017531	0	0.219094	0	0	k__Fungi; p__Ascomycota; c__Leotiomycetes; o__Helotiales; f__Dermateaceae; g__Pezicula; s__Pezicula heterochroma
0	0	0.00657951	0	0	0	0	0	k__Fungi; p__Ascomycota; c__Leotiomycetes; o__Helotiales; f__Dermateaceae; g__unidentified; s__Dermateaceae sp
0	0	0	0.00628541	0	0	0	0.00223963	k__Fungi; p__Ascomycota; c__Leotiomycetes; o__Helotiales; f__Helotiaceae; g__Articulospora; s__Articulospora proliferata
0	0	0.0113668	0.00135734	0.00799115	0.00197249	0	0	k__Fungi; p__Ascomycota; c__Leotiomycetes; o__Helotiales; f__Helotiaceae; g__Cyathicula; s__Cyathicula cyathoidea
0	0	0.00582565	0.00278262	0.0245735	0.0101093	0.00165951	0	k__Fungi; p__Ascomycota; c__Leotiomycetes; o__Helotiales; f__Helotiaceae; g__unidentified; s__Helotiaceae sp
0	0	0	0	0	0.0114175	0	0	k__Fungi; p__Ascomycota; c__Leotiomycetes; o__Helotiales; f__Hyaloscyphaceae; g__Cistella; s__Cistella sp
0	0	0	0.00553127	0	0	0	0.0019346	k__Fungi; p__Ascomycota; c__Leotiomycetes; o__Helotiales; f__Hyaloscyphaceae; g__Lachnum; s__Lachnum sp
0	0.0312856	0.00284169	0.00135734	0	0	0	0.000967299	k__Fungi; p__Ascomycota; c__Leotiomycetes; o__Helotiales; f__Incertae sedis; g__Cadophora; s__Cadophora luteo-olivacea
0	0.0300848	0.0255752	0.0176454	0.0159823	0.00788994	0.00323798	0.00870569	k__Fungi; p__Ascomycota; c__Leotiomycetes; o__Helotiales; f__Incertae sedis; g__Cadophora; s__Cadophora sp
0	0	0	0	0.0181501	0	0	0.0010985	k__Fungi; p__Ascomycota; c__Leotiomycetes; o__Helotiales; f__Incertae sedis; g__Glarea; s__Glarea lozoyensis
0	0.00435354	0.00328976	0	0	0	0	0	k__Fungi; p__Ascomycota; c__Leotiomycetes; o__Helotiales; f__Incertae sedis; g__Hyphodiscus; s__Hyphodiscus hymeniophilus
0	0	0.00852508	0.0135734	0	0.00197249	0.00323798	0.0183787	k__Fungi; p__Ascomycota; c__Leotiomycetes; o__Helotiales; f__Incertae sedis; g__Phacidiella; s__Phacidiella eucalypti
0	0	0.00563962	0	0	0.00195729	0	0	k__Fungi; p__Ascomycota; c__Leotiomycetes; o__Helotiales; f__Incertae sedis; g__Rhynchosporium; s__Rhynchosporium agropyri
0	0	0.00645427	0	0	0	0	0	k__Fungi; p__Ascomycota; c__Leotiomycetes; o__Helotiales; f__Incertae sedis; g__Sphaerographium; s__Sphaerographium nyssicola
0	0.00376059	0	0.00135734	0	0	0	0.000967299	k__Fungi; p__Ascomycota; c__Leotiomycetes; o__Helotiales; f__Incertae sedis; g__Spirosphaera; s__Spirosphaera cupreorufescens
0	0	0.0073405	0.00525929	0	0	0	0	k__Fungi; p__Ascomycota; c__Leotiomycetes; o__Helotiales; f__Incertae sedis; g__Tetracladium; s__Tetracladium sp
0	0	0	0.00425611	0	0.00591746	0.00183858	0.000967299	k__Fungi; p__Ascomycota; c__Leotiomycetes; o__Helotiales; f__Incertae sedis; g__Trimmatostroma; s__Trimmatostroma salinum
0	0	0	0	0	0	0	0.00677109	k__Fungi; p__Ascomycota; c__Leotiomycetes; o__Helotiales; f__Rutstroemiaceae; g__Lambertella; s__Lambertella corni-maris
0	0.00385473	0	0	0	0.00202186	0	0	k__Fungi; p__Ascomycota; c__Leotiomycetes; o__Helotiales; f__Sclerotiniaceae; g__Ciboria; s__Ciboria americana
0	0	0.00582565	0	0	0	0	0	k__Fungi; p__Ascomycota; c__Leotiomycetes; o__Helotiales; f__Sclerotiniaceae; g__Ciborinia; s__Ciborinia allii
0	0	0.00291282	0	0	0	0	0.00694058	k__Fungi; p__Ascomycota; c__Leotiomycetes; o__Helotiales; f__Sclerotiniaceae; g__Ciborinia; s__Ciborinia candolleana
0	0.0111949	0	0	0	0.00195729	0	0	k__Fungi; p__Ascomycota; c__Leotiomycetes; o__Incertae sedis; f__Incertae sedis; g__Collophora; s__Collophora paarla
0	0	0.00563962	0	0	0	0	0	k__Fungi; p__Ascomycota; c__Leotiomycetes; o__Rhytismatales; f__Incertae sedis; g__Fulvoflamma; s__Fulvoflamma eucalypti
0	0	0	0.00289878	0.00907505	0	0.00183858	0.000967299	k__Fungi; p__Ascomycota; c__Leotiomycetes; o__unidentified; f__unidentified; g__unidentified; s__Leotiomycetes sp
0	0	0	0.00314808	0	0	0	0	k__Fungi; p__Ascomycota; c__Pezizomycetes; o__Pezizales; f__Pyronemataceae; g__Hydnocystis; s__Hydnocystis piligera
0	0	0.00322713	0	0.00907505	0	0	0	k__Fungi; p__Ascomycota; c__Pezizomycetes; o__Pezizales; f__Pyronemataceae; g__unidentified; s__Pyronemataceae sp
0	0	0	0	0	0.00448006	0	0	k__Fungi; p__Ascomycota; c__Pezizomycetes; o__Pezizales; f__Sarcosomataceae; g__Plectania; s__Plectania melaena
0	0	0	0	0.0510622	0	0.00206902	0	k__Fungi; p__Ascomycota; c__Saccharomycetes; o__Saccharomycetales; f__Incertae sedis; g__Botryozyma; s__Botryozyma nematodophila
0	0.00854134	0	0	0	0	0	0	k__Fungi; p__Ascomycota; c__Saccharomycetes; o__Saccharomycetales; f__Incertae sedis; g__Candida; s__Candida fructus
0	0	0	0	0	0	0	0.00370854	k__Fungi; p__Ascomycota; c__Saccharomycetes; o__Saccharomycetales; f__Incertae sedis; g__Candida; s__Candida santamariae
0	0	0.00322713	0	0.00907505	0.00224003	0	0	k__Fungi; p__Ascomycota; c__Saccharomycetes; o__Saccharomycetales; f__Incertae sedis; g__Candida; s__Candida tallmaniae
0	0	0	0	0	0	0	0.0406266	k__Fungi; p__Ascomycota; c__Saccharomycetes; o__Saccharomycetales; f__Incertae sedis; g__Candida; s__Candida zeylanoides
0	0	0	0	0.117464	0	0	0	k__Fungi; p__Ascomycota; c__Saccharomycetes; o__Saccharomycetales; f__Incertae sedis; g__unidentified; s__Incertae sedis sp
0	0	0	0.00834787	0	0	0	0	k__Fungi; p__Ascomycota; c__Saccharomycetes; o__Saccharomycetales; f__Metschnikowiaceae; g__Metschnikowia; s__Metschnikowia viticola
0	0.148488	0	0	0	0	0	0	k__Fungi; p__Ascomycota; c__Saccharomycetes; o__Saccharomycetales; f__Pichiaceae; g__Pichia; s__Pichia kluyveri
0	0	0	0	0.055938	0	0	0	k__Fungi; p__Ascomycota; c__Saccharomycetes; o__Saccharomycetales; f__Saccharomycetaceae; g__Kazachstania; s__Kazachstania aerobia
0	0	0	0	0.091912	0	0	0	k__Fungi; p__Ascomycota; c__Saccharomycetes; o__Saccharomycetales; f__Saccharomycetaceae; g__Kazachstania; s__Kazachstania servazzii
0	0	0	0.00314808	0	0	0	0	k__Fungi; p__Ascomycota; c__Saccharomycetes; o__Saccharomycetales; f__Saccharomycetaceae; g__Kazachstania; s__Kazachstania telluris
0	0.0410287	0.0610366	0.00468952	0.0871269	0.0134875	0.00209104	0	k__Fungi; p__Ascomycota; c__Saccharomycetes; o__Saccharomycetales; f__Saccharomycetaceae; g__Tetrapisispora; s__Tetrapisispora blattae
0	0.0115642	0	0	0	0	0	0	k__Fungi; p__Ascomycota; c__Saccharomycetes; o__Saccharomycetales; f__Saccharomycopsidaceae; g__Saccharomycopsis; s__Saccharomycopsis crataegensis
0	0.0300848	0.0170502	0.00950135	1.23863	0.0295873	0.0372367	0.0106403	k__Fungi; p__Ascomycota; c__Saccharomycetes; o__Saccharomycetales; f__unidentified; g__unidentified; s__Saccharomycetales sp
0	0	0.00328976	0	0	0	0.00187426	0	k__Fungi; p__Ascomycota; c__Sordariomycetes; o__Calosphaeriales; f__Calosphaeriaceae; g__Togniniella; s__Togniniella microspora
0	0	0	0.00269376	0.0079296	0	0.00321304	0	k__Fungi; p__Ascomycota; c__Sordariomycetes; o__Diaporthales; f__Diaporthaceae; g__Diaporthe; s__Diaporthe bicincta
0	0	0	0.00278262	0	0	0	0	k__Fungi; p__Ascomycota; c__Sordariomycetes; o__Diaporthales; f__Diaporthaceae; g__Diaporthe; s__Diaporthe gulyae
0	0	0.0169188	0.0146875	0.0103211	0.0135147	0.00160652	0.0107564	k__Fungi; p__Ascomycota; c__Sordariomycetes; o__Diaporthales; f__Diaporthaceae; g__unidentified; s__Diaporthaceae sp
0	0.00435354	0	0.00314271	0	0	0	0	k__Fungi; p__Ascomycota; c__Sordariomycetes; o__Diaporthales; f__Gnomoniaceae; g__Gnomoniopsis; s__Gnomoniopsis idaeicola
0	0	0.00367025	0.0017531	0.0103211	0	0	0	k__Fungi; p__Ascomycota; c__Sordariomycetes; o__Diaporthales; f__Gnomoniaceae; g__Plagiostoma; s__Plagiostoma aesculi
0	0.00485708	0	0.0017531	0	0	0	0	k__Fungi; p__Ascomycota; c__Sordariomycetes; o__Diaporthales; f__Gnomoniaceae; g__Plagiostoma; s__Plagiostoma inclinatum
0	0	0	0.00834787	0	0.0397102	0	0	k__Fungi; p__Ascomycota; c__Sordariomycetes; o__Hypocreales; f__Clavicipitaceae; g__Claviceps; s__Claviceps purpurea
0	0	0	0	0.0103211	0.00254761	0	0	k__Fungi; p__Ascomycota; c__Sordariomycetes; o__Hypocreales; f__Cordycipitaceae; g__Beauveria; s__Beauveria kipukae
0	0.0133724	0	0.00407201	0	0.00394497	0	0	k__Fungi; p__Ascomycota; c__Sordariomycetes; o__Hypocreales; f__Incertae sedis; g__Sarocladium; s__Sarocladium strictum
0	0	0	0	0	0	0.00323798	0	k__Fungi; p__Ascomycota; c__Sordariomycetes; o__Hypocreales; f__Incertae sedis; g__Stachybotrys; s__Stachybotrys sp
0	0	0	0.00867317	0	0	0	0	k__Fungi; p__Ascomycota; c__Sordariomycetes; o__Hypocreales; f__Nectriaceae; g__Cylindrocladiella; s__Cylindrocladiella elegans
0	0	0	0.0349876	0	0	0	0	k__Fungi; p__Ascomycota; c__Sordariomycetes; o__Hypocreales; f__Nectriaceae; g__Fusarium; s__Fusarium concentricum
0	0	0	0.00308288	0	0	0	0	k__Fungi; p__Ascomycota; c__Sordariomycetes; o__Hypocreales; f__Nectriaceae; g__Fusarium; s__Fusarium poae
0	0	0	0.00314808	0	0	0	0	k__Fungi; p__Ascomycota; c__Sordariomycetes; o__Hypocreales; f__Nectriaceae; g__Fusarium; s__Fusarium sporotrichioides
0	0.105262	0	0.182053	0.0400385	0.0265752	0	0.0430672	k__Fungi; p__Ascomycota; c__Sordariomycetes; o__Hypocreales; f__Nectriaceae; g__unidentified; s__Nectriaceae sp
0	0	0	0.00157404	0	0.0022874	0	0	k__Fungi; p__Ascomycota; c__Sordariomycetes; o__Hypocreales; f__unidentified; g__unidentified; s__Hypocreales sp
0	0	0	0.00269376	0.0079296	0	0	0.000959849	k__Fungi; p__Ascomycota; c__Sordariomycetes; o__Incertae sedis; f__Apiosporaceae; g__unidentified; s__Apiosporaceae sp
0	0.00854134	0	0	0	0	0	0	k__Fungi; p__Ascomycota; c__Sordariomycetes; o__Incertae sedis; f__Glomerellaceae; g__Colletotrichum; s__Colletotrichum kinghornii
0	0	0	0	0	0	0	0.0019197	k__Fungi; p__Ascomycota; c__Sordariomycetes; o__Incertae sedis; f__Plectosphaerellaceae; g__Gibellulopsis; s__Gibellulopsis sp
0	0	0	0.00471406	0	0.0022835	0	0	k__Fungi; p__Ascomycota; c__Sordariomycetes; o__Magnaporthales; f__Magnaporthaceae; g__Pyricularia; s__Pyricularia sp
0	0.0654149	0	0	0.0204249	0.00391459	0	0.00123618	k__Fungi; p__Ascomycota; c__Sordariomycetes; o__unidentified; f__unidentified; g__unidentified; s__Sordariomycetes sp
0	0	0.00329538	0.00471944	0	0.0045709	0	0	k__Fungi; p__Ascomycota; c__Sordariomycetes; o__Xylariales; f__Amphisphaeriaceae; g__Monochaetia; s__Monochaetia sp
0	0.00436099	0	0	0	0.0022874	0	0	k__Fungi; p__Ascomycota; c__Sordariomycetes; o__Xylariales; f__Amphisphaeriaceae; g__Seiridium; s__Seiridium phylicae
0	0	0	0.00462432	0	0	0	0	k__Fungi; p__Ascomycota; c__Sordariomycetes; o__Xylariales; f__Amphisphaeriaceae; g__Truncatella; s__Truncatella spadicea
0	0.0261213	0	0.00659521	0	0.00504155	0	0.000991512	k__Fungi; p__Ascomycota; c__Sordariomycetes; o__Xylariales; f__Amphisphaeriaceae; g__unidentified; s__Amphisphaeriaceae sp
0	0	0	0	0	0	0	0.0019197	k__Fungi; p__Ascomycota; c__Sordariomycetes; o__Xylariales; f__Diatrypaceae; g__unidentified; s__Diatrypaceae sp
0	0.0741369	0	0	0	0	0	0	k__Fungi; p__Ascomycota; c__Sordariomycetes; o__Xylariales; f__Incertae sedis; g__Coniocessia; s__Coniocessia nodulisporioides
0	0	0.00657951	0.00471406	0	0.0022835	0	0	k__Fungi; p__Ascomycota; c__Sordariomycetes; o__Xylariales; f__Incertae sedis; g__Monographella; s__Monographella nivalis
0	0	0.0098749	0.00157404	0	0	0	0	k__Fungi; p__Ascomycota; c__Taphrinomycetes; o__Taphrinales; f__Protomycetaceae; g__Protomyces; s__Protomyces inouyei
0	0	0.036942	0.00407201	0	0.00394497	0.011283	0.0019346	k__Fungi; p__Ascomycota; c__Taphrinomycetes; o__Taphrinales; f__Taphrinaceae; g__Lalaria; s__Lalaria veronaerambellii
0	0	0.0483088	0.00407201	0.055938	0.00197249	0.0226658	0.00773839	k__Fungi; p__Ascomycota; c__Taphrinomycetes; o__Taphrinales; f__Taphrinaceae; g__Taphrina; s__Taphrina deformans
0	0	0.0164769	0.00314808	0.0278009	0.0022874	0.00563241	0.00448693	k__Fungi; p__Ascomycota; c__Taphrinomycetes; o__Taphrinales; f__Taphrinaceae; g__Taphrina; s__Taphrina sp
0	0.00427067	0.100041	0	0	0	0	0.002197	k__Fungi; p__Ascomycota; c__Taphrinomycetes; o__Taphrinales; f__Taphrinaceae; g__Taphrina; s__Taphrina tormentillae
0	0.00427067	0.332531	0.14686	0.0453752	0.0268803	0.0754208	0.182595	k__Fungi; p__Ascomycota; c__Taphrinomycetes; o__Taphrinales; f__Taphrinaceae; g__Taphrina; s__Taphrina wiesneri
0	0.00854134	0	0	0	0	0	0	k__Fungi; p__Basidiomycota; c__Agaricomycetes; o__Agaricales; f__Agaricaceae; g__Agaricus; s__Agaricus bisporus
0	0.00854134	0	0	0	0	0	0.0010985	k__Fungi; p__Basidiomycota; c__Agaricomycetes; o__Agaricales; f__Bolbitiaceae; g__Conocybe; s__Conocybe fiorii
0	0.00961185	0	0	0	0	0	0	k__Fungi; p__Basidiomycota; c__Agaricomycetes; o__Agaricales; f__Entolomataceae; g__Clitopilus; s__Clitopilus crispus
0	0	0.00329538	0.0141664	0	0.00914961	0.00187747	0.00112173	k__Fungi; p__Basidiomycota; c__Agaricomycetes; o__Agaricales; f__Inocybaceae; g__Inocybe; s__Inocybe unicolor
0	0	0	0	0	0.00764282	0	0	k__Fungi; p__Basidiomycota; c__Agaricomycetes; o__Agaricales; f__Marasmiaceae; g__Clitocybula; s__Clitocybula lacerata
0	0	0	0.00314808	0.018534	0.00457481	0	0.00112173	k__Fungi; p__Basidiomycota; c__Agaricomycetes; o__Agaricales; f__Physalacriaceae; g__Strobilurus; s__Strobilurus esculentus
0	0.00427067	0	0	0	0	0	0.0010985	k__Fungi; p__Basidiomycota; c__Agaricomycetes; o__Agaricales; f__Psathyrellaceae; g__Coprinellus; s__Coprinellus disseminatus
0	0	0	0.00291823	0.0185023	0.00195729	0	0	k__Fungi; p__Basidiomycota; c__Agaricomycetes; o__Agaricales; f__Psathyrellaceae; g__Coprinellus; s__Coprinellus xanthothrix
0	0	0.00726319	0	0.0102124	0	0	0.00123618	k__Fungi; p__Basidiomycota; c__Agaricomycetes; o__Agaricales; f__Psathyrellaceae; g__Coprinopsis; s__Coprinopsis brunneofibrillosa
0	0	0	0.00157404	0	0.00457481	0.00187747	0.00224347	k__Fungi; p__Basidiomycota; c__Agaricomycetes; o__Agaricales; f__Psathyrellaceae; g__Coprinopsis; s__Coprinopsis calospora
0	0	0	0.00314271	0	0	0	0	k__Fungi; p__Basidiomycota; c__Agaricomycetes; o__Agaricales; f__Psathyrellaceae; g__Coprinopsis; s__Coprinopsis scobicola
0	0.00870709	0	0.00471406	0	0.0022835	0.00187426	0.00111982	k__Fungi; p__Basidiomycota; c__Agaricomycetes; o__Agaricales; f__Psathyrellaceae; g__Psathyrella; s__Psathyrella candolleana
0	0	0.00568339	0	0	0	0.00161899	0	k__Fungi; p__Basidiomycota; c__Agaricomycetes; o__Agaricales; f__Schizophyllaceae; g__Schizophyllum; s__Schizophyllum commune
0	0	0.0036316	0.00173463	0	0	0	0	k__Fungi; p__Basidiomycota; c__Agaricomycetes; o__Agaricales; f__Strophariaceae; g__Psilocybe; s__Psilocybe montana
0	0	0	0.00278262	0	0	0	0	k__Fungi; p__Basidiomycota; c__Agaricomycetes; o__Agaricales; f__Tricholomataceae; g__Arrhenia; s__Arrhenia lobata
0	0.00961185	0.0210708	0.0302226	0.0370521	0.0123705	0.00995878	0.0135537	k__Fungi; p__Basidiomycota; c__Agaricomycetes; o__Agaricales; f__unidentified; g__unidentified; s__Agaricales sp
0	0.00385473	0	0.00139131	0.00819118	0.00202186	0	0.000991512	k__Fungi; p__Basidiomycota; c__Agaricomycetes; o__Auriculariales; f__Incertae sedis; g__Elmerina; s__Elmerina cladophora
0	0.0194283	0.00367025	0.00644262	0.0309634	0.0223133	0.00209104	0.00499734	k__Fungi; p__Basidiomycota; c__Agaricomycetes; o__Auriculariales; f__Incertae sedis; g__Exidia; s__Exidia saccharina
0	0	0.00322713	0.00462432	0	0.00224003	0	0.0010985	k__Fungi; p__Basidiomycota; c__Agaricomycetes; o__Auriculariales; f__unidentified; g__unidentified; s__Auriculariales sp
0	0	0	0	0	0.011437	0	0	k__Fungi; p__Basidiomycota; c__Agaricomycetes; o__Cantharellales; f__Ceratobasidiaceae; g__unidentified; s__Ceratobasidiaceae sp
0	0	0	0	0	0.00195729	0.00321304	0	k__Fungi; p__Basidiomycota; c__Agaricomycetes; o__Corticiales; f__Corticiaceae; g__unidentified; s__Corticiaceae sp
0	0	0.00291282	0	0.0655294	0	0	0	k__Fungi; p__Basidiomycota; c__Agaricomycetes; o__Gloeophyllales; f__Gloeophyllaceae; g__Gloeophyllum; s__Gloeophyllum sepiarium
0	0	0.00329538	0.00314808	0.00926698	0.0022874	0	0.00448693	k__Fungi; p__Basidiomycota; c__Agaricomycetes; o__Gloeophyllales; f__Gloeophyllaceae; g__Gloeophyllum; s__Gloeophyllum trabeum
0	0.0242854	0	0	0.0206423	0	0	0	k__Fungi; p__Basidiomycota; c__Agaricomycetes; o__Hymenochaetales; f__Hymenochaetaceae; g__Fomitiporia; s__Fomitiporia aethiopica
0	0.00480593	0	0.00173463	0	0	0	0	k__Fungi; p__Basidiomycota; c__Agaricomycetes; o__Hymenochaetales; f__Hymenochaetaceae; g__Fomitiporia; s__Fomitiporia sp
0	0.0223898	0.014099	0.00538753	0.0555072	0.0176156	0.00642608	0.0038394	k__Fungi; p__Basidiomycota; c__Agaricomycetes; o__Hymenochaetales; f__Hymenochaetaceae; g__Inonotus; s__Inonotus rickii
0	0	0	0	0	0.00456699	0	0	k__Fungi; p__Basidiomycota; c__Agaricomycetes; o__Hymenochaetales; f__Schizoporaceae; g__Schizopora; s__Schizopora flavipora
0	0	0.00329538	0	0	0.00457481	0	0	k__Fungi; p__Basidiomycota; c__Agaricomycetes; o__Polyporales; f__unidentified; g__unidentified; s__Polyporales sp
0	0.00427067	0	0	0.00907505	0	0	0.0019197	k__Fungi; p__Basidiomycota; c__Agaricomycetes; o__Russulales; f__Russulaceae; g__Russula; s__Russula tricholomopsis
0	0	0.00651689	0	0.00925115	0.00452352	0	0.00111982	k__Fungi; p__Basidiomycota; c__Agaricomycetes; o__Russulales; f__unidentified; g__unidentified; s__Russulales sp
0	0	0	0	0	0	0	0.00198302	k__Fungi; p__Basidiomycota; c__Agaricostilbomycetes; o__Agaricostilbales; f__Agaricostilbaceae; g__Bensingtonia; s__Bensingtonia ingoldii
0	0	0	0.00308288	0.0181501	0.00732895	0	0.00441724	k__Fungi; p__Basidiomycota; c__Agaricostilbomycetes; o__Agaricostilbales; f__Agaricostilbaceae; g__Bensingtonia; s__Bensingtonia miscanthi
0	0.0257069	0	0.0249323	0	0.0202907	0	0.006591	k__Fungi; p__Basidiomycota; c__Agaricostilbomycetes; o__Agaricostilbales; f__Agaricostilbaceae; g__Bensingtonia; s__Bensingtonia phyllada
0	0.0435354	0.00986927	0.0361411	0	0.0502369	0.00187426	0.0100784	k__Fungi; p__Basidiomycota; c__Agaricostilbomycetes; o__Agaricostilbales; f__Agaricostilbaceae; g__Bensingtonia; s__Bensingtonia pseudonaganoensis
0	0.00436099	0	0.00629617	0	0.0320236	0.00187747	0.0100956	k__Fungi; p__Basidiomycota; c__Agaricostilbomycetes; o__Agaricostilbales; f__Agaricostilbaceae; g__Bensingtonia; s__Bensingtonia sp
0	0	0	0.00417393	0	0	0	0	k__Fungi; p__Basidiomycota; c__Agaricostilbomycetes; o__Agaricostilbales; f__Chionosphaeraceae; g__Chionosphaera; s__Chionosphaera cuniculicola
0	0	0	0	0	0.00394497	0	0	k__Fungi; p__Basidiomycota; c__Agaricostilbomycetes; o__Agaricostilbales; f__Chionosphaeraceae; g__Kurtzmanomyces; s__Kurtzmanomyces tardus
0	0	0	0.00462432	0	0.00448006	0	0.0010985	k__Fungi; p__Basidiomycota; c__Agaricostilbomycetes; o__unidentified; f__unidentified; g__unidentified; s__Agaricostilbomycetes sp
0	0	0	0	0	0.00504155	0	0	k__Fungi; p__Basidiomycota; c__Cystobasidiomycetes; o__Cystobasidiales; f__Cystobasidiaceae; g__Occultifur; s__Occultifur sp
0	0.0339995	0.0220215	0.136742	0.0103211	0.135023	0.00418208	0.00249867	k__Fungi; p__Basidiomycota; c__Cystobasidiomycetes; o__Erythrobasidiales; f__Incertae sedis; g__Erythrobasidium; s__Erythrobasidium sp
0	0	0	0	0	0	0	0.00773839	k__Fungi; p__Basidiomycota; c__Exobasidiomycetes; o__Entylomatales; f__unidentified; g__unidentified; s__Entylomatales sp
0	0.0304748	0.013159	0.0392838	0.00925115	0.0319689	0	0.00559909	k__Fungi; p__Basidiomycota; c__Exobasidiomycetes; o__Exobasidiales; f__Exobasidiaceae; g__Exobasidium; s__Exobasidium formosanum
0	0	0	0.00350619	0	0	0	0	k__Fungi; p__Basidiomycota; c__Exobasidiomycetes; o__Exobasidiales; f__Exobasidiaceae; g__Exobasidium; s__Exobasidium inconspicuum
0	0	0	0.00314271	0	0	0	0	k__Fungi; p__Basidiomycota; c__Exobasidiomycetes; o__Exobasidiales; f__Exobasidiaceae; g__Exobasidium; s__Exobasidium miyabei
0	0.0130606	0	0	0	0	0	0	k__Fungi; p__Basidiomycota; c__Exobasidiomycetes; o__Exobasidiales; f__Exobasidiaceae; g__Exobasidium; s__Exobasidium nobeyamense
0	0	0	0	0	0.00986243	0	0	k__Fungi; p__Basidiomycota; c__Exobasidiomycetes; o__Exobasidiales; f__Exobasidiaceae; g__Exobasidium; s__Exobasidium sp
0	0.00752119	0.00568339	0.00271467	0.055938	0.0653127	0	0	k__Fungi; p__Basidiomycota; c__Exobasidiomycetes; o__Exobasidiales; f__unidentified; g__unidentified; s__Exobasidiales sp
0	0	0	0.00278262	0	0.00202186	0	0.00297454	k__Fungi; p__Basidiomycota; c__Exobasidiomycetes; o__Incertae sedis; f__Incertae sedis; g__Tilletiopsis; s__Tilletiopsis pallescens
0	0.00971416	0.0256918	0.00350619	0	0	0	0	k__Fungi; p__Basidiomycota; c__Exobasidiomycetes; o__Microstromatales; f__Microstromataceae; g__Microstroma; s__Microstroma juglandis
0	0.0747462	0.0064514	0.0986495	0.0260717	0.137486	0.0084951	0.0853687	k__Fungi; p__Basidiomycota; c__Exobasidiomycetes; o__unidentified; f__unidentified; g__unidentified; s__Exobasidiomycetes sp
0	0	0	0	0	0.00254761	0.00209104	0.00124934	k__Fungi; p__Basidiomycota; c__Microbotryomycetes; o__Incertae sedis; f__Incertae sedis; g__Curvibasidium; s__Curvibasidium cygneicollum
0	0	0.00582565	0	0.0327647	0	0	0	k__Fungi; p__Basidiomycota; c__Microbotryomycetes; o__Leucosporidiales; f__Leucosporidiaceae; g__Leucosporidium; s__Leucosporidium drummii
0	0.00485708	0	0	0	0	0.00209104	0.011244	k__Fungi; p__Basidiomycota; c__Microbotryomycetes; o__Leucosporidiales; f__Leucosporidiaceae; g__Leucosporidium; s__Leucosporidium golubevii
0	0	0	0	0.0079296	0.00391459	0.00160652	0.00863864	k__Fungi; p__Basidiomycota; c__Microbotryomycetes; o__Sporidiobolales; f__Incertae sedis; g__Rhodosporidium; s__Rhodosporidium babjevae
0	0.00436099	0	0	0	0.0022874	0	0.00224347	k__Fungi; p__Basidiomycota; c__Microbotryomycetes; o__Sporidiobolales; f__Incertae sedis; g__Rhodotorula; s__Rhodotorula acheniorum
0	0	0	0.00173463	0	0	0	0.00123618	k__Fungi; p__Basidiomycota; c__Microbotryomycetes; o__Sporidiobolales; f__Incertae sedis; g__Rhodotorula; s__Rhodotorula bacarum
0	0	0.0073405	0	0	0	0	0	k__Fungi; p__Basidiomycota; c__Microbotryomycetes; o__Sporidiobolales; f__Incertae sedis; g__Rhodotorula; s__Rhodotorula mucilaginosa
0	0	0	0	0.0306373	0.582299	0	0	k__Fungi; p__Ascomycota; c__Dothideomycetes; o__Venturiales; f__Venturiaceae; g__Venturia; s__Venturia cerasi
0	0	0.0454671	0.00407201	0.0239734	0.00591746	0.0210468	0.0164441	k__Fungi; p__Basidiomycota; c__Microbotryomycetes; o__Sporidiobolales; f__Incertae sedis; g__Sporobolomyces; s__Sporobolomyces clavatus
0	0	0	0	0	0	0	0.0033652	k__Fungi; p__Basidiomycota; c__Microbotryomycetes; o__Sporidiobolales; f__Incertae sedis; g__Sporobolomyces; s__Sporobolomyces elongatus
0	0.00870709	0	0	0	0.00685049	0	0.00111982	k__Fungi; p__Basidiomycota; c__Microbotryomycetes; o__Sporidiobolales; f__Incertae sedis; g__Sporobolomyces; s__Sporobolomyces linderae
0	0	0	0.00134688	0	0	0.00160652	0.0019197	k__Fungi; p__Basidiomycota; c__Microbotryomycetes; o__Sporidiobolales; f__Incertae sedis; g__Sporobolomyces; s__Sporobolomyces marcillae
0	0	0	0.00134688	0	0.0137011	0	0	k__Fungi; p__Basidiomycota; c__Microbotryomycetes; o__Sporidiobolales; f__Incertae sedis; g__Sporobolomyces; s__Sporobolomyces ruber
0	0.0388566	0	0.0227903	0	0.0254761	0.0669133	0.0756191	k__Fungi; p__Basidiomycota; c__Microbotryomycetes; o__Sporidiobolales; f__Incertae sedis; g__Sporobolomyces; s__Sporobolomyces ruberrimus
0	0.0115642	0	0.0194784	0.00819118	0.00808744	0	0.000991512	k__Fungi; p__Basidiomycota; c__Microbotryomycetes; o__Sporidiobolales; f__Incertae sedis; g__Sporobolomyces; s__Sporobolomyces subbrunneus
0	0	0.00659077	0	0	0	0.00187747	0.00112173	k__Fungi; p__Basidiomycota; c__Microbotryomycetes; o__Sporidiobolales; f__Incertae sedis; g__unidentified; s__Incertae sedis sp
0	0	0	0.00350619	0	0	0	0	k__Fungi; p__Basidiomycota; c__Pucciniomycetes; o__Pucciniales; f__Uropyxidaceae; g__Tranzschelia; s__Tranzschelia anemones
0	0.00854134	0	0	0	0	0	0	k__Fungi; p__Basidiomycota; c__Pucciniomycetes; o__Pucciniales; f__Uropyxidaceae; g__Tranzschelia; s__Tranzschelia discolor
0	0.0111949	0	0	0	0.00587188	0	0	k__Fungi; p__Basidiomycota; c__Pucciniomycetes; o__Septobasidiales; f__Septobasidiaceae; g__Septobasidium; s__Septobasidium sp
0	0	0.00367025	0	0	0	0.217468	0	k__Fungi; p__Basidiomycota; c__Tremellomycetes; o__Cystofilobasidiales; f__Cystofilobasidiaceae; g__Cystofilobasidium; s__Cystofilobasidium capitatum
0	0	0	0	0.0185023	0	0	0	k__Fungi; p__Basidiomycota; c__Tremellomycetes; o__Cystofilobasidiales; f__Cystofilobasidiaceae; g__Cystofilobasidium; s__Cystofilobasidium infirmominiatum
0	0	0.00329538	0	0	0	0.00187747	0.212008	k__Fungi; p__Basidiomycota; c__Tremellomycetes; o__Cystofilobasidiales; f__Cystofilobasidiaceae; g__Udeniomyces; s__Udeniomyces kanasensis
0	0	0	0	0.0102124	0	0	0.00247236	k__Fungi; p__Basidiomycota; c__Tremellomycetes; o__Cystofilobasidiales; f__Cystofilobasidiaceae; g__Udeniomyces; s__Udeniomyces megalosporus
0	0	0	0	0	0	0.00836416	0	k__Fungi; p__Basidiomycota; c__Tremellomycetes; o__Cystofilobasidiales; f__Cystofilobasidiaceae; g__Xanthophyllomyces; s__Xanthophyllomyces dendrorhous
0	0	0.00328976	0.00785676	0	0	0	0.0067189	k__Fungi; p__Basidiomycota; c__Tremellomycetes; o__Cystofilobasidiales; f__unidentified; g__unidentified; s__Cystofilobasidiales sp
0	0.00961185	0	0.00173463	0	0	0	0.0321406	k__Fungi; p__Basidiomycota; c__Tremellomycetes; o__Tremellales; f__Incertae sedis; g__Bullera; s__Bullera unica
0	0	0.00367025	0	0.299313	0.00254761	0.00418208	0	k__Fungi; p__Basidiomycota; c__Tremellomycetes; o__Tremellales; f__Incertae sedis; g__Cryptococcus; s__Cryptococcus aureus
0	0	0	0	0	0	0	0.0019197	k__Fungi; p__Basidiomycota; c__Tremellomycetes; o__Tremellales; f__Incertae sedis; g__Cryptococcus; s__Cryptococcus bestiolae
0	0.00870709	0	0.00942812	0	0.0159845	0.00749705	0.0190369	k__Fungi; p__Basidiomycota; c__Tremellomycetes; o__Tremellales; f__Incertae sedis; g__Cryptococcus; s__Cryptococcus heimaeyensis
0	0.00485708	0.0073405	0.0153361	0.0308547	0	0.00206902	0	k__Fungi; p__Basidiomycota; c__Tremellomycetes; o__Tremellales; f__Incertae sedis; g__Derxomyces; s__Derxomyces yunnanensis
0	0.0170827	0.0225899	0	0.0544503	0.0336004	0.00919292	0.002197	k__Fungi; p__Basidiomycota; c__Tremellomycetes; o__Tremellales; f__Incertae sedis; g__Dioszegia; s__Dioszegia buhagiarii
0	0	0.00692698	0	0	0	0.00620705	0.00483027	k__Fungi; p__Basidiomycota; c__Tremellomycetes; o__Tremellales; f__Incertae sedis; g__Dioszegia; s__Dioszegia changbaiensis
0	0	0	0.00471406	0	0.013701	0	0.00783872	k__Fungi; p__Basidiomycota; c__Tremellomycetes; o__Tremellales; f__Incertae sedis; g__Dioszegia; s__Dioszegia rishiriensis
0	0.00376059	0.0110108	0.0017531	0	0.00452009	0	0.00124934	k__Fungi; p__Basidiomycota; c__Tremellomycetes; o__Tremellales; f__Incertae sedis; g__Dioszegia; s__Dioszegia sp
0	0	0	0	0	0.00404372	0	0	k__Fungi; p__Basidiomycota; c__Tremellomycetes; o__Tremellales; f__Incertae sedis; g__Dioszegia; s__Dioszegia zsoltii var. zsoltii
0	0	0.00568339	0.00135734	0.00799115	0.00394497	0	0.0019346	k__Fungi; p__Basidiomycota; c__Tremellomycetes; o__Tremellales; f__Incertae sedis; g__Hannaella; s__Hannaella coprosmae
0	0	0.00659077	0	0	0	0	0	k__Fungi; p__Basidiomycota; c__Tremellomycetes; o__Tremellales; f__Incertae sedis; g__Hannaella; s__Hannaella zeae
0	0	0	0	0	0.00448006	0	0	k__Fungi; p__Basidiomycota; c__Tremellomycetes; o__Tremellales; f__Incertae sedis; g__Kockovaella; s__Kockovaella machilophila
0	0	0	0	0	0	0	0.00198302	k__Fungi; p__Basidiomycota; c__Tremellomycetes; o__Tremellales; f__Incertae sedis; g__Papiliotrema; s__Papiliotrema bandonii
0	0	0	0.00157404	0.00926698	0	0	0	k__Fungi; p__Basidiomycota; c__Tremellomycetes; o__Tremellales; f__Incertae sedis; g__Tremella; s__Tremella aurantialba
0	0	0.00582565	0	0	0	0	0	k__Fungi; p__Basidiomycota; c__Tremellomycetes; o__Tremellales; f__Incertae sedis; g__Tremella; s__Tremella candelariellae
0	0.00961185	0	0.00350619	0	0.00254761	0	0.00249867	k__Fungi; p__Basidiomycota; c__Tremellomycetes; o__Tremellales; f__Incertae sedis; g__Tremella; s__Tremella giraffa
0	0.00746326	0	0.00134688	0	0	0	0	k__Fungi; p__Basidiomycota; c__Tremellomycetes; o__Tremellales; f__Incertae sedis; g__Tremella; s__Tremella indecorata
0	0.00427067	0	0.00154144	0	0	0	0	k__Fungi; p__Basidiomycota; c__Tremellomycetes; o__Tremellales; f__Incertae sedis; g__Tremella; s__Tremella sp
0	0.0288356	0.0108948	0	0	0.00504155	0.00206902	0	k__Fungi; p__Basidiomycota; c__Tremellomycetes; o__Trichosporonales; f__Trichosporonaceae; g__Cryptotrichosporon; s__Cryptotrichosporon anacardii
0	0	0.00328976	0	0.0185023	0	0.00374852	0	k__Fungi; p__Basidiomycota; c__Ustilaginomycetes; o__Ustilaginales; f__Ustilaginaceae; g__unidentified; s__Ustilaginaceae sp
0	0.00373163	0	0	0	0	0.00160652	0	k__Fungi; p__Chytridiomycota; c__Chytridiomycetes; o__Spizellomycetales; f__Spizellomycetaceae; g__Powellomyces; s__Powellomyces sp
0	0	0	0	0	0	0	0.00198302	k__Fungi; p__Chytridiomycota; c__Chytridiomycetes; o__Spizellomycetales; f__Spizellomycetaceae; g__Spizellomyces; s__Spizellomyces pseudodichotomus
0	0	0.00659077	0	0	0	0	0	k__Fungi; p__Chytridiomycota; c__unidentified; o__unidentified; f__unidentified; g__unidentified; s__Chytridiomycota sp
0	0	0.00281981	0.00269376	0.0079296	0.00587188	0	0	k__Fungi; p__Glomeromycota; c__Glomeromycetes; o__Archaeosporales; f__Archaeosporaceae; g__Archaeospora; s__Archaeospora sp
0	0	0	0	0	0	0	0.004394	k__Fungi; p__Glomeromycota; c__Glomeromycetes; o__Glomerales; f__Glomeraceae; g__Funneliformis; s__Funneliformis mosseae
0	0	0	0.00447419	0	0	0	0.000991512	k__Fungi; p__Glomeromycota; c__Glomeromycetes; o__Glomerales; f__Glomeraceae; g__Rhizophagus; s__Rhizophagus sp
